1 **Beyond BioID: Streptavidin outcompetes antibody fluorescence signals in protein**  
2 **localization and readily visualises targets evading immunofluorescence detection**

3 Johanna Odenwald<sup>1</sup>, Bernardo Gabiatti<sup>1</sup>, Silke Braune<sup>1</sup>, Siqi Shen<sup>2</sup>, Martin Zoltner<sup>2\*</sup> and  
4 Susanne Kramer<sup>1\*</sup>

5

6

7 <sup>1</sup> Biocenter, University of Würzburg, Würzburg, Germany

8 <sup>2</sup> Department of Parasitology, Faculty of Science, Charles University in Prague, Biocev, Vestec,

9 Prague, Czech Republic

10

11 \* corresponding authors

12 Tel.: +49 931 3186785

13 Email: [susanne.kramer@uni-wuerzburg.de](mailto:susanne.kramer@uni-wuerzburg.de)

14 Email: [martin.zoltner@natur.cuni.cz](mailto:martin.zoltner@natur.cuni.cz)

15

16 short title: Imaging applications of TurboID

17

18

19 **ABSTRACT**

20 Immunofluorescence is a common method to localise proteins within their cellular context via  
21 fluorophore labelled antibodies and for some applications without alternative. However,  
22 some protein targets evade detection due to low protein abundance or accessibility issues. In  
23 addition, some imaging methods require a massive reduction in antigen density thus impeding  
24 detection of even medium-abundant proteins.

25 Here, we show that the fusion of the target protein to TurboID, a biotin ligase labelling lysine  
26 residues in close proximity, and subsequent detection of biotinylation by fluorescent  
27 streptavidin offers an “all in one” solution to the above-mentioned restrictions. For a wide  
28 range of target proteins tested, the streptavidin signal was significantly stronger than an  
29 antibody signal, markedly improving the imaging sensitivity in expansion microscopy and  
30 correlative light and electron microscopy, with no loss in resolution. Importantly, proteins  
31 within phase-separated regions, such as the central channel of the nuclear pores, the  
32 nucleolus or RNA granules, were readily detected with streptavidin, while most antibodies fail  
33 to label proteins in these environments. When TurboID is used in tandem with an HA epitope  
34 tag, co-probing with streptavidin and anti-HA can be used to map antibody-accessibility to  
35 certain cellular regions. As a proof of principle, we mapped antibody access to all  
36 trypanosome nuclear pore proteins (NUPs) and found restricted antibody labelling of all FG  
37 NUPs of the central channel that are known to be phase-separated, while most non-FG Nups  
38 could be labelled. Lastly, we show that streptavidin imaging can resolve dynamic, temporally  
39 and spatially distinct sub-complexes and, in specific cases, reveal a history of dynamic protein  
40 interaction.

41 In conclusion, streptavidin imaging has major advantages for the detection of lowly abundant  
42 or inaccessible proteins and in addition, can provide information on protein interactions and  
43 biophysical environment.

44  
45  
46

## 47 INTRODUCTION

48 Visualisation of a protein within the cellular context is routinely achieved either by fusing it to  
49 a fluorescent protein, or by using fluorophore labelled antibodies specific for a target protein  
50 or peptide tag that is genetically fused to it. Fluorescent proteins are not suitable for all  
51 imaging applications, because fluorescence is lost under fixation and permeabilization  
52 conditions. Applications that are fully dependent on antibodies include correlative electron  
53 and light microscopy (CLEM) applications, expansion microscopy or protein detection in  
54 combination with *in situ* hybridisation for nucleic acid detection.

55

56 Sometimes, antibodies fail to detect a protein at its expected localisation, which is rarely  
57 followed up or reported. We recently observed the absence of an anti-HA antibody signal at  
58 the nuclear pores for endogenously expressed trypanosome mRNA export factor MEX67 fused  
59 to the small peptide hemagglutinin (HA) epitope tag: the anti-HA signal was entirely restricted  
60 to the nucleoplasm (Moreira et al., 2023). Likewise, a polyclonal antibody raised against *T.*  
61 *brucei* MEX67 did not stain the nuclear pores (Pozzi et al., 2023). In contrast, fusions of *T.*  
62 *brucei* MEX67 to fluorescent proteins (either N- or C-terminally) are primarily detected at the  
63 nuclear pores with some signal extending to the nucleoplasm (Billington et al., 2023; Kramer  
64 et al., 2010). This is in agreement with the reported function of *T. brucei* MEX67 in mRNA  
65 export (Dostalova et al., 2013; Schwede et al., 2009) and with nuclear pore localisation of  
66 MEX67 orthologues in other eukaryotes (Katahira et al., 1999; Köhler and Hurt, 2007; Mangus  
67 et al., 2003; Rodriguez et al., 2004; Stewart, 2019; Sträßer et al., 2000; Terry and Wente, 2007)  
68 where Mex67 was even termed a mobile nucleoporin (Derrer et al., 2019). We next expressed  
69 *Tb*MEX67 fused to a TurboID-HA tandem tag. TurboID is a biotin ligase, widely employed for  
70 proximity labelling techniques facilitating analysis of protein interactions *in vivo* (Branon et al.,  
71 2018). To our surprise, fluorophore labelled streptavidin readily delivered a signal localizing  
72 primarily to the nuclear pores and partially to the nucleoplasm, consistent with the  
73 localisation of MEX67 fused to fluorescent proteins (Moreira et al., 2023). We therefore  
74 concluded that the streptavidin signal shows the correct localization of MEX67, while  
75 antibodies fail to bind MEX67 at the nuclear pore and selectively stain the nucleoplasmic  
76 fraction of MEX67. One possible reason for the absence of antibody stain could be the  
77 localisation of MEX67 to the central channel of the nuclear pore that is lined by phenylalanine-  
78 glycine nucleoporins (FG NUPs), intrinsically disordered proteins dominated by FG-repeats,

79 that assemble to a dense meshwork and create a phase-separated environment, physically  
80 distinct from the rest of the cell (Davis et al., 2022; Nag et al., 2022).

81

82 Here, we set out to investigate whether streptavidin imaging offers a general solution to  
83 antibody-accessibility problems. We expressed 11 trypanosome and one mammalian protein  
84 of different *bona fide* phase-separated regions (nucleolus, stress granules, central channel of  
85 the nuclear pores) fused to a TurboID-HA tandem tag. All proteins could be readily visualised  
86 with streptavidin, while they could not be labelled with anti-HA. Importantly, we noticed that  
87 streptavidin imaging has further major advantages to antibody labelling, even for antibody-  
88 accessible proteins: (i) the multiple biotinylation sites of the bait and adjacent proteins  
89 provided a massive boost in signal, which is in particular useful in applications with diluted  
90 antigens, such as expansion microscopy or correlative light and electron microscopy (CLEM);  
91 (ii) since biotinylation extends to adjacent proteins and is stable over the lifetime of a protein,  
92 protein interactions are preserved in time, enabling to monitor dynamic processes in the cell.

## 93 MATERIALS and METHODS

94

### 95 *Culture and genetic modification of trypanosomes*

96 *T. b. brucei* Lister 427 procyclic cells were cultured in SDM-79 (Brun and Schönenberger, 1979).  
97 Generation of transgenic trypanosomes was performed using standard methods (McCulloch  
98 et al., 2004). Almost all trypanosome fusion proteins were expressed from the endogenous  
99 locus, by modifying one allele via a PCR-based approach reliant on a (modified) version of the  
100 pPOT vector system (Dean et al., 2015). Occasionally, a plasmid-based system was used for  
101 endogenous tagging (Kelly et al., 2007). For overexpression of ALPH1-eYFP, a tetracycline  
102 inducible system was used (Sunter et al., 2012) and expression was induced for 24 hours.  
103 Details about all fusion constructs are provided in Table S1. The TurboID-HA tandem tag  
104 encodes the TurboID open reading frame, followed by a two-amino acid long spacer (AS),  
105 followed by the HA tag (YPYDVDPYA). The TurboID-Ty1 tandem tag encodes the TurboID open  
106 reading frame, followed by a short linker (ASGSGS), followed by the Ty1 tag (EVHTNQDPLD).  
107 The 3Ty1-NG-3Ty1 tag, allowing fusion of mNeonGreen (NG) flanked by two triple Ty1  
108 epitopes, originates from the pPOT system (Dean et al., 2015).

109

### 110 *Culture and genetic manipulation of HeLa cells*

111 pEGFP-N1 was modified to contain the sequence encoding TurboID-HA with a stop-codon  
112 upstream of the eGFP sequence. Sequences of the open reading frames of NUP88 and NUP54  
113 were amplified from human cDNA and cloned in frame downstream of the TurboID-HA  
114 sequence. This results in expression of NUP88 or NUP54 fused to the N-terminal TurboID-HA  
115 tag, without the eGFP. The sequences of the fusion proteins are provided in Table S1. HeLa  
116 cells were grown in Dulbecco's modified Eagle's medium (DMEM; Gibco by Life Technologies,  
117 Darmstadt, Germany) supplemented with 10% fetal calf serum (FCS; Capricorn Scientific,  
118 Ebsdorfergrund, Germany) and 1% penicillin-streptomycin (Thermo Fisher Scientific,  
119 Dreieich, Germany) at 37°C and 5% CO<sub>2</sub>. Cells were transfected with the respective TurboID-  
120 HA fusion constructs using Effectene™ (Qiagen, Hilden, Germany) following the  
121 manufacturer's protocol and incubated for ~24 hours in a petri-dish containing a coverslip.  
122 Immunofluorescence/streptavidin labelling was performed on cells attached to the coverslips,  
123 as detailed below for trypanosomes.

124

## 125 *Immunofluorescence and streptavidin labelling*

126 About  $1 \times 10^7$  procyclic-form *T. brucei* cells, harvested at a density of  $5 \times 10^6$  cells/ml, were  
127 washed once in 1 ml SDM79 without hemin and serum and resuspended in 500  $\mu$ l PBS. For  
128 fixation, 500  $\mu$ l of 8% paraformaldehyde was added for 20 min while rotating. After addition  
129 of 7 ml PBS supplemented with 20 mM glycine, cells were pelleted, resuspended in 150  $\mu$ l  
130 PBS, and spread on poly-lysine-coated slides (within circles drawn with a hydrophobic pen).  
131 Cells were allowed to settle for 15 min, before removing surplus PBS and permeabilizing cells  
132 with 0.5% Triton X-100 in PBS. Slides were rinsed in PBS, and cells were then blocked in 3%  
133 bovine serum albumin (BSA) in PBS for 30 min, followed by 60 min incubation with rabbit  
134 mAb-anti-HA C29F4 (1:500 dilution; Cell Signaling Technology) and Streptavidin-Cy3 (1:200  
135 dilution; Jackson Laboratories) in PBS/3% BSA. Slides were washed in PBS (three times for 5  
136 min), then incubated with anti-rabbit Alexa Fluor Plus 488 (1:500 dilution, A32731 Invitrogen)  
137 in PBS/3% BSA for 50 min and a further 10 min upon addition of 4',6-diamidino-2-phenylindole  
138 (DAPI) (0.1  $\mu$ g/ml). Slides were washed 3  $\times$  5 min in PBS and embedded into ProLong Diamond  
139 Antifade Mountant (Thermo Fisher Scientific). For control experiments, the following  
140 antibodies/nanobodies were used: Ty1-tag monoclonal antibody BB2 (hybridoma  
141 supernatant, 1:300); *T. brucei* MEX67 polyclonal antiserum (1:1000, kind gift of Mark  
142 Carrington) and anti-GFP nanobody (GFP-Booster Alexa Fluor 647 Chromotek gb2AF647,  
143 1:1000).

144

## 145 *Microscopy*

146 For most fluorescence microscopy experiments, images were acquired using a DMI8 widefield  
147 microscope (Thunder Imager, Leica Microsystems, Germany) with a HCX PL APO CS  
148 objective (100x, NA = 1.4, Leica Microsystems) and Type F Immersion Oil (refractive index =  
149 1.518, Leica Microsystems). The microscope was controlled using LAS-X software (Leica  
150 Microsystems). Samples were illuminated with an LED8 light source (Leica). Excitation light  
151 was selected by using the following filter sets: Ex 391/32 nm; DC 415nm; Em 435/30 nm  
152 (DAPI), 436/28 nm; DC 459 nm; Em 519/25 nm (AlexaFluor™ 488), 554/24 nm; DC 572 nm;  
153 Em 594/32 nm (Cy3), 578/24 nm; DC 598 nm; Em 641/78 nm (AlexaFluor™ 594). Images  
154 were captured using a K5 sCMOS camera (Leica, 6.5  $\mu$ m pixel size). Between 50 and 70  
155 images in 140 nm distances were recorded for each Z-stack. Exposure times were 100-200  
156 ms for DAPI and between 200-800 ms for all other fluorophores. For some images, an inverted  
157 wide-field microscope Leica DMI6000B (Leica Microsystems GmbH, Wetzlar, Germany)

158 equipped with a 100x oil immersion objective (NA 1.4) and a Leica DFC365 camera (6.5  
159  $\mu\text{m}/\text{pixel}$ ) was used. Filter sets were (i) ex: 340–380 nm, dc: 400nm, em: 450–490 nm (DAPI),  
160 (ii) ex: 450–490 nm, dc: 495nm, em: 500–550 nm (eYFP), (iii) ex: 530–560nm, dc: 570 nm, em:  
161 572- 648 nm (TMR). Image acquisition was done like on the thunder imager. Images are shown  
162 either unprocessed (raw data) or processed by instant computational clearing (Software  
163 provided by the Thunder imager) or deconvolution using Huygens Essential software (Scientific  
164 Volume Imaging BV). Presentations are either as single plane or as Z-stack projection (sum  
165 slices), as indicated. Scanning electron microscopy and correlation with light microscopy was  
166 done as previously described (Kramer et al., 2020).

167

#### 168 *Affinity enrichment of biotinylated proteins and on beads digestion*

169 The isolation of biotinylated proteins from trypanosomes and preparation for mass  
170 spectrometry was done as previously described (Moreira et al., 2023), except that 1 mM biotin  
171 was added during the elution step from the streptavidin beads by tryptic digest, to improve  
172 recovery of biotinylated peptides.

173

#### 174 *Western blots*

175 Western blotting was performed using standard methods. Detection of biotinylated proteins  
176 was done with Streptavidin-IRDye<sup>®</sup> 680LT (LI-COR) (1:20,000). Proteins with HA-tag(s) were  
177 detected using rat mAb-anti-HA 3F10 (Roche, 1:1000) as primary antibody and IRDye<sup>®</sup> 800CW  
178 Goat anti-Rat IgG (Licor, 1:20,000) as secondary antibody.

179

#### 180 *Mass spectrometry and proteomics analysis*

181 TurboID-eluted peptides were resuspended in 50 mM  $\text{NH}_4\text{HCO}_3$  and passed over C18 stage tip  
182 columns as described (Rappsilber et al., 2007) and then analyzed by LC–MS/MS on an  
183 Ultimate3000 nano rapid separation LC system (Dionex) coupled to an LTQ Orbitrap Fusion  
184 mass spectrometer (Thermo Fisher Scientific). Minimum peptide length was set at seven  
185 amino acids allowing a maximum of two missed cleavages, and FDRs of 0.01 were calculated  
186 at the levels of peptides, proteins, and modification sites based on the number of hits against  
187 the reversed sequence database. Spectra were processed using the intensity-based label-free  
188 quantification (LFQ) in MaxQuant version 2.1.3.0 (Cox and Mann, 2008; Cox et al., 2014)  
189 searching the *T. brucei* strain TREU927 annotated protein database (version 63) from

190 TriTrypDB (Aslett et al., 2010). Statistical analyses of LFQ data were done in Perseus (Tyanova  
191 et al., 2016). LFQ values were filtered for at least one valid value in the bait sample group, log2  
192 transformed and missing values imputed from a normal distribution of intensities around the  
193 detection limit of the mass spectrometer. These values were subjected to a Student's t-test  
194 comparing the respective bait sample groups to an untagged control (wt parental cells)  
195 triplicate sample group. The resulting t-test difference is the difference between the means of  
196 logarithmic abundances of a protein group. Bait samples were prepared in duplicate (NUP76,  
197 NUP96, NUP110) or triplicate (MEX67, NUP158). All proteomics data have been deposited at  
198 the ProteomeXchange Consortium via the PRIDE partner repository (Perez-Riverol et al., 2019)  
199 with the dataset identifier PXD031245 (MEX67, NUP158, wt control, GFP control) and  
200 PXD047268 (NUP76, NUP96, NUP110).

201

#### 202 *Ultrastructural Expansion Microscopy (U-ExM) with procyclic T. brucei*

203 The U-ExM method was performed as described in (Gambarotto et al., 2020) with some  
204 modifications.  $1 \times 10^7$  trypanosome cells were harvested (1500 g, 10 min) and the pellet  
205 resuspended in 500  $\mu$ l PBS. 500  $\mu$ l 8% formaldehyde (FA, 36.5-38%, F8775, Sigma)/8%  
206 acrylamide (AA, 40%, A4058, Sigma) diluted in PBS was added to achieve a final concentration  
207 of 4%FA/4%AA. Cells were allowed to settle on a 12 mm round coverslip treated with poly-L-  
208 lysine (P8920, Sigma) placed in a well of a 24-well plate. The adjacent wells were filled with  
209 ddH<sub>2</sub>O, the plate sealed with parafilm and incubated at 37°C for 5 hours. A small piece of  
210 parafilm was placed on top of a humid chamber, where a drop of monomer solution (sodium  
211 acrylate 23% (w/v) (408220, Sigma), AA 10% (w/v), N-N'-methylenebisacrylamide 0.1% (w/v)  
212 (M7279, Sigma) in PBS) was added. The coverslip was placed on top of the drop, with the cells  
213 facing down. The coverslip was removed, cleaned from excess liquid with a laboratory wipe  
214 and placed in 40  $\mu$ l of monomer solution freshly complemented with 1  $\mu$ l 10% APS  
215 (327085000, Acros Organic) and 1  $\mu$ l 10% TEMED (T7024, Sigma). Sodium acrylate stock  
216 solution 38% (w/v) was prepared by dissolving 1.9 g sodium acrylate in 3.1 ml of ddH<sub>2</sub>O  
217 followed by filtering through 0.2  $\mu$ m filter. The humid chamber was closed, and the gel allowed  
218 to polymerize for one hour at 37°C. Coverslips were transferred to a well of a 6-well plate  
219 containing 1 ml denaturation buffer (200 mM SDS (A1112, Applichem), 200 mM NaCl (A2942,  
220 Applichem) and Tris-HCl pH 9 (5429.3, Roth)) and incubated for 15 minutes with gentle  
221 shaking. Gels were detached from the coverslips with a spatula and transferred to a 1.5 mL



222 Eppendorf tube. The tube was filled with denaturation buffer to the top, closed and incubated  
223 at 95°C for 90 minutes in a heating block. Gels were transferred to a beaker with 100 ml ddH<sub>2</sub>O  
224 for the first round of expansion for 30 minutes. Water was exchanged and two more rounds  
225 of expansion were done, the last one being overnight at room temperature. The next day, gels  
226 were carefully transferred to a Petri dish and imaged to measure the expansion factor. Gels  
227 were transferred to a fresh beaker containing 100 ml PBS and incubated for 15 minutes. This  
228 was repeated once and then the gel was trimmed to a square of about 12 x 12 mm which was  
229 transferred to a 24-well plate for antibody incubation. Gels were incubated with 0.5 ml PBS  
230 BSA 3% (A1391, Applichem) with primary antibodies (mouse-anti-HA monoclonal antibodies  
231 (C29F4, Cell Signaling) at 1:500) at 37°C for three hours in a plate shaker at 1500 RPM. Gels  
232 were transferred to a 6-well plate for washing. They were washed three times with 10 ml PBS-  
233 T (0.1% Tween20 in PBS) for 10 minutes with agitation at room temperature. Gels were  
234 transferred back to a 24-well plate and incubated with 0.5 ml PBS BSA 3% with secondary  
235 antibodies AlexaFluor™ 488 goat anti-rabbit (A11008, Sigma, 1:500), Cy3-streptavidin and 0.1  
236 µg/ml DAPI (D9542, Sigma) at 37°C for three hours in a plate shaker at 1500 RPM. Gels were  
237 transferred to the 6-well plate and washed four times with 10 ml PBS-T for 10 minutes with  
238 agitation at room temperature, all steps from now on protected from light. Gel pieces were  
239 expanded again in 100 ml ddH<sub>2</sub>O in a beaker, with three water exchanges each 30 minutes and  
240 the last expansion step done overnight at room temperature. An imaging chamber Nunc™  
241 Lab-Tek™ II with one chamber (734-2055, Thermofisher Scientific) was covered with a layer of  
242 poly-D-lysine (A3890401, Gibco) for one hour and left to dry overnight. For imaging, the gel  
243 pieces were trimmed to fit the chamber, excess water was removed with a laboratory wipe  
244 and the gel was placed in the imaging chamber, taking care not to shift after the initial  
245 placement. A drop of water was added to cover the top of the gel. The gel chamber was closed  
246 with the lid to avoid evaporation during imaging. For longer imaging sessions, drops of water  
247 were periodically added to prevent gel drying. Since cells can be on either side of the gel, the  
248 gel was divided into two pieces, one facing up and one facing down, to ensure cells can be  
249 detected, on either piece.

250

#### 251 *Protein retention Expansion Microscopy (proExM) in procyclic T. brucei*

252 The proExM method was performed as described in (Tillberg et al., 2016) with some  
253 modifications.  $5 \times 10^7$  cells were harvested by centrifugation at 1500 g for 10 minutes, washed

254 once in 10 ml PBS and finally resuspended in 1 ml of PBS. 1 ml of PFA 8% (P6148, Sigma) was  
255 added and cells were fixed for 20 minutes at room temperature with rotation. 13 ml 20 mM  
256 glycine (50046, Sigma) in PBS (freshly prepared from a 2M stock) was added to quench and  
257 cells were harvested at 1500 g for 10 minutes. Cells were resuspended in 1 ml PBS and let to  
258 adhere to a 12 mm coverslip, previously treated with poly-L-lysine, placed in a well of a 24  
259 well plate for 15 minutes. The well was rinsed with PBS and the coverslip incubated with PBS  
260 0.5% Triton for 5 minutes for permeabilization. Wells were rinsed again with PBS and  
261 coverslips incubated with PBS 3% BSA for 30 minutes for blocking. 50  $\mu$ l of primary antibody  
262 solution (rabbit anti-HA monoclonal antibodies (C29F4, Cell Signaling) 1:50 diluted in PBS BSA  
263 1%) were placed on a piece of parafilm in a humid chamber and the cover slip was placed on  
264 top (cells facing down) for one hour in a humid chamber. The coverslip was returned to the  
265 well of the 24 well plate, cells facing up, and wells were washed with PBS (3 x 5 min) with  
266 agitation. 250  $\mu$ l secondary antibodies (streptavidin-Cy3 (SA1010, Sigma) 1:1000; AlexaFluor™  
267 488 goat anti-rabbit (A11008, Sigma) 1:250) and DAPI ((D9542, Sigma) 1:1000) were added,  
268 diluted in 250  $\mu$ l PBS BSA 1%. Wells were washed with PBS (4 x 5 min). From now on, all steps  
269 were done protected from light. To anchor the proteins to the gel, we prepared a solution of  
270 5 mg AcX (Acryloyl-X, SE, 6-((acryloyl)amino)hexanoic Acid, Succinimidyl Ester, A20770,  
271 Invitrogen) in 500  $\mu$ l anhydrous DMSO (D12345, Invitrogen); AcX solution was opened and  
272 aliquoted in a desiccated environment at  $-20^{\circ}\text{C}$ . AcX was diluted 1:100 in PBS, a drop was  
273 placed on a piece of parafilm in a humid chamber, the coverslips were placed top-down into  
274 the AcX drop and incubated at room temperature for 16 hours. Coverslips were returned to a  
275 well of a 24 well plate, washed twice for 5 minutes with PBS and stored in the fridge until the  
276 end of the day.

277

278 Monomer solution was prepared with sodium acrylate 8.6% (w/v) (408220, Sigma), AA 2.5%  
279 (w/v), N-N'-methylenebisacrylamide 1.5% (w/v) (M7279, Sigma) and NaCl 11.7% (w/v)  
280 (AM9760G, Ambion) in PBS; sodium acrylate stock solution 33% (w/v) was freshly prepared  
281 by dissolving 1.9 g sodium acrylate in 5 ml of ddH<sub>2</sub>O, 0.2  $\mu$ m-filtered. For gelation, gelling  
282 solution was prepared from 100  $\mu$ l monomer solution, 1  $\mu$ l 10% APS and 1  $\mu$ l 10% TEMED,  
283 vortexed and used instantly. 50  $\mu$ l of gelling solution was placed on a piece of parafilm in a  
284 humid chamber; the coverslips were placed on top, cells facing downwards, and incubated at

285 37°C for one hour. After polymerization, coverslips with the gel attached were transferred to  
286 a well of a 6-well plate with 1 ml of digestion solution (0.5% Triton X100, 1 mM EDTA pH 8  
287 (AM9260G, Ambion), 50 mM Tris pH 8 (AM9855G, Ambion) and 1 M NaCl (AM9760G, Ambion)  
288 freshly supplemented with 10 µl proteinase K (P8107S, New England Biolabs). Plates were  
289 stored slightly tilted to ensure the coverslip was completely covered with digestion solution  
290 and incubated at room temperature overnight. Next day, gels were either already detached  
291 from the coverslip or could be easily detached with a spatula. Gels were transferred to a Petri  
292 dish and three rounds of expansion, each with 20 ml ddH<sub>2</sub>O for 20 minutes, were done. After  
293 this, a picture was taken to measure the expansion factor. Gel mounting in the imaging  
294 chamber and imaging were done as described for UExM.  
295

## 296 RESULTS

297

### 298 **1. TurboID-fusion proteins can be accurately localised with fluorescent streptavidin by light** 299 **microscopy**

300 To establish a robust imaging system for TurboID fusion proteins by streptavidin, we expressed  
301 the *T. brucei* nuclear pore proteins NUP110, NUP76 and NUP96 fused to a TurboID-HA tandem  
302 tag in procyclic *Trypanosoma brucei* cells using both N and C-terminal fusion for each  
303 respective target protein. The tag is composed of the biotin ligase TurboID (Branon et al.,  
304 2018) and the HA peptide tag. Expression was constitutive from the endogenous locus and  
305 labelling relied on the biotin substrate present in the medium (0.8  $\mu$ M in SDM79) (Moreira et  
306 al., 2023). Biotinylated proteins were purified by streptavidin affinity and analysed by liquid  
307 chromatography coupled to tandem mass spectrometry (LC-MS/MS), using both, wild type  
308 cells and cells expressing TurboID-GFP for background correction (Moreira et al., 2023). For  
309 each bait protein, we quantified and visualised the biotinylation of all other nuclear pore  
310 proteins and known transport factors in *t*-test difference increments (Figure 1A, Figure S1,  
311 Table S2). Additionally, we reanalysed previously published data of C-terminally tagged MEX67  
312 and NUP158 in the same way ((Moreira et al., 2023), Figure 1A, Figure S1, Table S2)). Neither  
313 of the bait proteins caused biotinylation of the entire pore complex. Instead, we observed  
314 highly specific labelling patterns for each bait. While the central NUP96 biotinylated most  
315 nuclear pore proteins with the marked exception of the nuclear basket, NUP158 and NUP76  
316 caused biotinylation of specific sub-complexes of the pore and MEX67 labelled NUPs lining  
317 the channel of the pore (Moreira et al., 2023). The data show that the labelling radius of  
318 TurboID, under these conditions, is below the size of the nuclear pore and thus well below the  
319 resolution of light microscopy.

320

321 Next, we imaged cells expressing nuclear pore proteins fused to the TurboID-HA tandem tag  
322 using both cy3-streptavidin and anti-HA in combination with a secondary antibody coupled to  
323 the Alexa488 fluorophore (Figure 1B). For *T. brucei* NUP132-TurboID-HA, no obvious  
324 differences in resolution were observed between antibody-based and streptavidin-based  
325 detection (Figure 1C). Likewise, for human NUP88, expressed as N-terminal TurboID-HA fusion  
326 protein in HeLa cells, grown in DMEM medium (relying on the biotin of the serum supplement  
327 with a low nanomolar concentration), the signal of anti-HA and of streptavidin appeared

328 highly similar (Figure 1D). The data demonstrated that imaging of Turbo-ID fusion proteins via  
329 streptavidin is a reliable alternative, with a resolution that is indistinguishable from antibody-  
330 based immunofluorescence in standard light microscopy, which is in agreement with  
331 published data on experimentally determined BioID labelling radii (Branon et al., 2018; Kim et  
332 al., 2016).

333

## 334 **2. TurboID-fusion proteins can be imaged in phase separated/protein-dense regions**

335 We had previously expressed one of the *T. brucei* nuclear mRNA transporters, *TbMEX67*, fused  
336 to TurboID-HA and observed that anti-HA failed to stain MEX67 at the nuclear pores, indicating  
337 a possible failure of the antibody to either penetrate phase separated areas or to bind the  
338 epitope in this environment (details in introduction, (Moreira et al., 2023), Figure 2A).

339 To test this hypothesis, we focussed on two additional *bona fine* phase-separated regions: the  
340 nucleolus and starvation stress granules. We expressed a C-terminal TurboID-HA fusion of the  
341 trypanosome nucleolar GTP-binding protein NOG1 (Tb927.11.3120) (Billington et al., 2023).  
342 The resulting streptavidin signal was exclusively at the nucleolus, which is tractable as distinct  
343 compartment within the nucleus lacking DAPI fluorescence (Figure 2B). In contrast, the HA-  
344 signal showed no obvious accumulation in the nucleolus and was extremely weak with a  
345 patchy distribution throughout the entire cell body, indicating an unspecific background stain  
346 (Figure 2B). Thus, just like MEX67, the nucleolar protein NOG1 is detectable by streptavidin,  
347 but not by anti-HA immunofluorescence. Next, we starved trypanosome cells that were  
348 expressing the established starvation stress granule marker PABP2 (Fritz et al., 2015; Kramer  
349 et al., 2013) fused to TurboID-HA and probed the cells with the streptavidin anti-HA  
350 combination. Both anti-HA and streptavidin readily detected starvation stress granules (Figure  
351 2C). However, the granules detected by anti-HA were in general less distinct and appeared  
352 larger than those detected by streptavidin. Indeed, intensity profiles drawn through Z-stack  
353 projections of stress granules were  $1.4 \pm 0.2$  -fold wider for anti-HA detection in comparison to  
354 streptavidin detection and the corresponding HA profiles frequently exhibited a double-peak  
355 (Figure 2D and E). The data are consistent with anti-HA preferentially staining the periphery  
356 of the granules, while streptavidin diffuses into and binds within these dense, phase separated  
357 particles. A switch of the two fluorophores (Cy3 and Alexa488) gave identical results,  
358 controlling for microscopy artefacts as a reason for the differences (Figure S2). Direct eYFP-  
359 fluorescence intensity profiles of granules from cells expressing PABP2-eYFP resembled those

360 of the streptavidin stain, ruling out a preferential granule-peripheral localisation of PABP2 as  
361 an explanation (Figure S3). Thus, anti-HA fails to label three distinct phase-separated  
362 structures of the trypanosome cell, the nuclear pore channel, the nucleolus and the inside of  
363 starvation stress granules, while streptavidin faithfully decorates all these structures.

364 The inability of anti-HA to detect target epitopes within phase-separated areas is not  
365 restricted to trypanosomes: When expressing TurboID-HA fusions of the human FG-repeat  
366 nucleoporin NUP54 in HeLa cells, streptavidin detected the proteins at the nuclear pores,  
367 while no specific anti-HA signal was observed (Figure 2F).

368 Furthermore, the inability to label phase-separated areas is not restricted to anti-HA but  
369 applies to other antibodies. We expressed *T. brucei* MEX67 and NOG1 fused to TurboID-Ty1  
370 and failed to label the nuclear pores and the nucleolus with anti-Ty1 (BB2), respectively, while  
371 the streptavidin signal displayed the correct localisations (Figure 2G and H). Moreover, MEX67  
372 was undetectable by polyclonal antiserum (Figure 2I; (Pozzi et al., 2023)) and an eGFP-fusion  
373 of MEX67 could not be detected by fluorophore labelled eGFP nanobodies (Figure 2J). In  
374 contrast, an eGFP fusion of NOG1 was detectable by eGFP nanobodies at the nucleolus, albeit  
375 weakly (Figure 2J). Also, when NOG1 was fused to mNeogreen flanked on either site by three  
376 Ty1-epitope sequences, anti-Ty1 solely detected the periphery of the nucleolus, but failed to  
377 stain the centre (Figure 2K). In conclusion, most but not all antibodies/nanobodies were  
378 ineffective in phase separated areas.

379

### 380 **3. Boosting the signal under low-antigen conditions (expansion microscopy, CLEM)**

381 A potential advantage for imaging TurboID fusion proteins with streptavidin is an increased  
382 signal: TurboID is expected to cause multiple lysine-biotinylation of both the bait protein and  
383 proteins in close proximity, while antibodies only decorate several (polyclonals) or one specific  
384 (monoclonals) epitope of a target protein. Indeed, for many TurboID-HA fusion proteins that  
385 we analysed by standard light microscopy, the streptavidin signal appeared significantly  
386 stronger and devoid of background stain when comparing to anti-HA. To quantify this  
387 observation, we probed cells expressing NUP158-TurboID-HA with combinations of anti-  
388 HA/Alexa488 secondary antibody and Streptavidin-Cy3 (Figure 3A) or with Streptavidin-  
389 Alexa488 and anti-HA/Alexa594 secondary antibody (Figure 3B). Under both labelling  
390 conditions, the streptavidin stain resulted in significantly less non-specific cytoplasmic  
391 background signal than anti-HA (Figure 3A-B). Moreover, the maximum Alexa488 signal of Z-

392 stack projections was 2.9-fold higher for streptavidin than for anti-HA (N=60, unpaired two-  
393 tailed  $t$ -test=9.6E-55) (Figure 3C). An increase in fluorescence signal is desirable for the  
394 detection of low abundance proteins, but also for imaging applications that necessitate a  
395 reduction in antigen density, such as expansion microscopy or CLEM.

396  
397 In expansion microscopy, biomolecules are covalently cross-linked to a hydrogel, that is  
398 subsequently swollen by osmosis, causing a physical magnification of the sample (Chen et al.,  
399 2015). Even a relatively small expansion factor of 3 causes a 27-fold increase in sample volume  
400 and thus a 27-fold decrease in antigen-density. The two main expansion microscopy methods  
401 are Protein-retention Expansion Microscopy (proExM) (Tillberg et al., 2016) and Ultra-  
402 structural Expansion Microscopy (U-ExM) (Gambarotto et al., 2019). The main difference is  
403 that in proExM, antibody labelling is applied prior to the expansion process, while in U-ExM it  
404 is done afterwards. U-ExM thus generally results in higher resolution, as the linkage-error  
405 (difference between position of the fluorophore of the secondary antibody and the position  
406 of the target protein) is not expanded. Next to the decrease in antigen-density as a  
407 consequence of the expansion, the signal is further compromised by the harsh conditions  
408 associated with the method, as for example an incubation step at 95°C in alkaline SDS-  
409 containing buffer for 90 min for U-ExM and an over-night proteinase K digestion for ProExM.  
410 To assess the potential of streptavidin imaging, we employed both proExM and U-ExM on cell  
411 lines expressing TurboID-HA fusions of two trypanosome nuclear-pore localised proteins  
412 (NUP76 and MEX67) and compared the signals from streptavidin and anti-HA (Figure 3D). For  
413 both proteins, streptavidin caused a strong and uniform stain of all nuclear pores with both  
414 expansion microscopy methods. In contrast, anti-HA failed to detect nuclear pores either  
415 completely (MEX67) or partially (NUP76) in U-ExM. In proExM, pores could be stained evenly  
416 with anti-HA, but the signal was much lower in comparison to streptavidin, in particular for  
417 NUP76. To our knowledge, this is the first time that streptavidin imaging of a biotin ligase-  
418 fused protein was used in combination with expansion microscopy. In our hands, streptavidin  
419 clearly outperformed antibodies in both expansion protocols and with both target proteins  
420 that we tested, giving a significantly stronger signal with less background.

421  
422 CLEM causes an even larger reduction in accessible antigen than expansion microscopy. Thin  
423 slices of a resin-embedded sample are first used for immunofluorescence and imaged by light

424 microscopy, and, in a second step, imaged by electron microscopy. The resin largely prevents  
425 antibody penetration and probing is therefore restricted to the small fraction of antigens  
426 present at the surface of the resin slice. Trypanosome cells expressing NUP96-TurboID-HA or  
427 NUP158-TurboID-HA were embedded in LR-white and slices were probed with streptavidin  
428 and anti-HA. For both proteins, the streptavidin signal detected numerous pores for each  
429 nucleus, while anti-HA detected between 0 and 2 pores and, in addition, caused considerably  
430 higher background signals (Figure 3E and Figure S4 in Supplementary materials). Streptavidin  
431 is thus more suitable for CLEM, and an example, targeting NUP158-TurboID-HA with both  
432 steps, is shown in Figure 3F.

433

434 In summary, streptavidin detection causes a massive increase in signal that is in particularly  
435 beneficial under low-antigen density conditions, and thus offers significant implications in  
436 expansion microscopy and CLEM.

437

#### 438 **4. Visualization of protein interactions**

439 We found that in most cases, streptavidin labelling faithfully reflects the steady state  
440 localisation of a bait protein, e.g., the localisation resembles those observed with  
441 immunofluorescence or direct fluorescence imaging of GFP-fusion proteins. For certain bait  
442 proteins, this is not the case, for example, if the bait protein or its interactors have a dynamic  
443 localisation to distinct compartments, or if interactions are highly transient. It is thus essential  
444 to control streptavidin-based *de novo* localisation data by either antibody labelling (if possible)  
445 or by direct fluorescence of fusion-proteins for each new bait protein. However, any additional  
446 signal from biotinylated partner proteins at a different location can also be leveraged to gain  
447 relevant information on the function and dynamics of the bait protein. Three respective  
448 examples are detailed below:

449

450 The first is PABP2, one of two trypanosome poly(A) binding proteins, that has established,  
451 unambiguous cytoplasmic localisation, when visualised with either anti-HA or when expressed  
452 fused to a fluorescent protein (Figure 4A-B, (Billington et al., 2023; Kramer et al., 2013).  
453 However, when PABP2-TurboID-HA expressing cells are probed with streptavidin, a signal at  
454 the posterior pole of the cell is observed, in addition to the expected cytoplasmic signal (Figure  
455 4A). Localisation to the posterior pole is an exclusive feature of the trypanosome mRNA



456 decapping enzyme ALPH1 and its four interaction partners: a small proportion of this mRNA  
457 decapping complex localises to the posterior pole, in a dynamic manner, while the majority  
458 remains cytoplasmic (Kramer, 2017; Kramer et al., 2008; Kramer et al., 2023) (Figure 4B). The  
459 streptavidin signal at the posterior pole of the PABP2-TurboID-HA cells thus likely reflects a  
460 historic cytoplasmic interaction between PABP2 and the mRNA decapping complex. The  
461 existence of this interaction is supported by the identification of all five posterior-pole  
462 localised members of the decapping complex by mass spectrometry data from a PABP2 BioID  
463 experiment (Moreira et al., 2023). Notably, imaging with streptavidin adds information about  
464 protein dynamic interactions, that mass spectrometry data alone cannot uncover. In this case,  
465 it shows that the fraction of mRNA decapping proteins at the posterior pole is dynamically  
466 exchanged with the fraction in the cytoplasm.

467

468 The second example is MLP2 (also called NUP92), a divergent nucleoporin of Kinetoplastida  
469 involved in chromosome distribution during mitosis (Holden et al., 2014; Morelle et al., 2015).  
470 MLP2 localisation is cell cycle dependent: while exhibiting a nuclear localisation during  
471 interphase, it migrates to the spindle and spindle pole during mitosis (Holden et al., 2014;  
472 Morelle et al., 2015) (Figure S5). We expressed MLP2 fused to an N-terminal TurboID-HA tag  
473 and examined the streptavidin and HA signal in interphase and mitotic cells (Figure 4C). Note  
474 that in trypanosomes the kinetoplast (mitochondrial DNA, visible as small dot in DAPI stain)  
475 divides prior to the nucleus and numbers and positions of kinetoplasts and nuclei are  
476 established markers for cell cycle stages (Sherwin and Gull, 1989). We observed that the  
477 streptavidin signal “lacked behind” the anti-HA signal at all cell cycle stages. This is most  
478 obvious in anaphase, when anti-HA exclusively stains the spindle pole body, while streptavidin  
479 decorates both, the nuclei and the spindle pole body. Thus, for proteins with cell-cycle  
480 dependent localisation, streptavidin-labelling provides information on both, the previous  
481 localisation(s) of the bait, in addition to its current position.

482

483 The third example are nuclear pore proteins. For all NUPs that we tested, we observed the  
484 expected streptavidin signal at the nuclear pores (see below). However, for some NUPs, for  
485 example NUP65, we observed additional cytoplasmic streptavidin stain that is absent for  
486 others, as for example NUP75 (Figure 4 D-E). There were also differences in the amount of  
487 nucleoplasmic biotinylation between NUPs. For example, NUP75 showed more nuclear

488 labelling than NUP65 (Figure 4 D-E). The likeliest explanation is, that some NUPs are contacting  
489 and thus proximity-labelling proteins in transit. The streptavidin stain in the nucleoplasm or  
490 cytoplasm thus provides information about the functions of the individual NUPs in protein  
491 import or export, respectively.

492

### 493 **5. A phase-separation map of the *T. brucei* nuclear pore**

494 We reasoned that our findings that all phase-separated regions of trypanosomes that we  
495 tested are inaccessible to anti-HA can be exploited as a tool for de novo identification of  
496 phase-separated regions. As a proof of principle, we employed streptavidin-imaging to  
497 produce a map of antibody-inaccessible regions of the entire trypanosome nuclear pore  
498 complex. We endogenously expressed all known trypanosome nuclear pore proteins fused to  
499 TurboID-HA from one allele. For each protein, two cell lines were constructed, one with  
500 TurboID-HA fused to the C-terminus, and one with the tag at the N-terminus. We excluded  
501 Mlp2/Nup92, as we found this protein localizing to the nucleus rather than the nuclear pores  
502 in most interphase cells (Figure S5 in Supplementary material and Figure 4C), in agreement  
503 with (Morelle et al., 2015). For two C-terminal fusion candidate proteins (Sec13, NUP140) and  
504 one N-terminal (NUP82), we repeatedly failed to obtain cell lines. The remaining 45 cell lines  
505 were controlled by western blot probed with anti-HA to confirm the correct size of the fusion  
506 protein (Figure S6). Next, cells from all cell lines were probed with anti-HA and fluorescent  
507 streptavidin. All cell lines showed streptavidin signal predominantly at the nuclear pores,  
508 proving the correct localisation of the fusion proteins (Figure 5A). For N-terminally tagged  
509 NUP64 we also observed between one and two streptavidin dots in the nucleus, consistent  
510 with the localisation of eYFP-NUP64 in life cells (Billington et al., 2023); a likely mislocalisation.  
511 When evaluating the HA signal at the nuclear pores, we observed no antibody stain for the  
512 NUPs lining the central channel, while most NUPs at the periphery of the channel were  
513 accessible to the antibody (Figure 5). Importantly, there is no correlation between protein  
514 abundancy, as determined by proteomics (Tinti and Ferguson, 2022), and  
515 immunofluorescence signal, ruling out low antigen abundance as the reason for its absence  
516 (Figure S7). All the FG-NUPs of the inner channel (which are known to phase-separate) were  
517 among the non-accessible proteins, supporting the idea that the crucial determinant  
518 preventing anti-HA detection is mainly or entirely phase separation. Likewise, the mRNA-  
519 interacting NUP76 complex consisting of NUP76 and the FG NUPs NUP140 and NUP149

520 appear non-accessible to anti-HA, except when NUP149 is tagged at the N-terminus. The  
521 NUP76 interacting protein NUP158 was inaccessible to antibodies when tagged at the N-  
522 terminus, but not at the C-terminus: this is consistent with NUP158 being partially phase-  
523 separated as it contains FG-repeats exclusively at the N-terminal half. Among the antibody  
524 inaccessible proteins were also some non-FG NUPs. These include proteins of the inner ring,  
525 NUP181, NUP144, C-terminally tagged NUP225 and N-terminally tagged NUP65, as well as N-  
526 terminally tagged proteins of the outer ring, NUP89 and NUP41. Whether the respective  
527 termini of these proteins extend into phase separated areas, or whether antibody access is  
528 prevented by steric or other hindrances remains unknown.

529 In conclusion, we here provide an antibody access map of the entire *T. brucei* nuclear pore  
530 that includes all bone-fine FG-NUPs in addition to some non-FG NUPs.

531

532

533

534 **DISCUSSION**

535 We here show that the use of the TurboID-HA tandem tag offers an “all in one” solution to  
536 antibody-accessibility problems, without compromising resolution or the strength of the  
537 signal. Quite the contrary, streptavidin imaging of TurboID-HA tagged proteins facilitates a  
538 massive boost in signal, extending the benefits of the method to protein targets with low  
539 antigen abundance. Furthermore, the TurboID-HA tag is suitable to probe protein interactions  
540 and provide some evidence for phase-separation.

541

542 **One protocol suits all - streptavidin readily traces biotin proximity labels**

543 Many proteins are not accessible to antibodies in standard immunofluorescence protocols, in  
544 particular proteins localized in phase-separated regions. MEX67 could not be detected at the  
545 trypanosome nuclear pore by anti-HA, anti-Ty1, anti-Protein A, polyclonal MEX67 antibodies  
546 and even nanobodies to mNeonGreen (this work, (Dostalova et al., 2013; Moreira et al., 2023;  
547 Pozzi et al., 2023)); likewise, the human Mex67 homologue TAP/Nxf1 evaded detection by  
548 antiserum (Bear et al., 1999). HA-fused trypanosome FG-NUPs and the human FG-NUP NUP54  
549 could not be decorated with anti-HA. Trypanosome starvation stress granules could only be  
550 labelled at the periphery and nucleolar proteins evaded antibody detection in trypanosomes  
551 (Figure 2) and in human cells (Misteli, 2008; Musinova et al., 2011; Sheval et al., 2005;  
552 Zatssepina et al., 1997). There are several approaches available to trouble-shoot antigen-  
553 accessibility problems (Piña et al., 2022). Pre-extraction steps prior to fixation employing  
554 Triton X100, high salt or nucleases proved successful for the detection of mammalian Mex67  
555 homologue TAP/NXF1 (Ben-Yishay et al., 2019; Katahira et al., 1999). Antibody penetration to  
556 nucleolar proteins was improved by including protease treatment (Svistunova et al., 2011).  
557 Further, fixation by cold methanol instead of paraformaldehyde was reported to increase  
558 antibody access to proteins (Neuhaus et al., 1998). However, the search for individual  
559 solutions for each problematic antibody/antigen pair is cumbersome and an improvement of  
560 antibody access typically comes at the expense of signal loss and/or disruption of cellular  
561 morphology (Piña et al., 2022). With streptavidin labelling we present a method that works  
562 for every protein (we tested ~30), without compromising cellular morphology and, most  
563 importantly, provides a strong signal as significant additional benefit.

564

565 In standard light microscopy, streptavidin imaging offers a resolution comparable to labelling  
566 with antibodies. The labelling radius of the biotin ligase BirA was estimated to be  
567 approximately 10 nm by using the NUP107-160 Y-complex of the mammalian nuclear pore as  
568 a molecular ruler (Kim et al., 2014), enabling for example the determination of substructures  
569 of P-bodies and stress granules (Youn et al., 2018). It is thus within the range of an average-  
570 sized protein and well below the resolution limit of light microscopy. Consistently, cells  
571 expressing nuclear membrane associated proteins fused to BirA (or variants as the related  
572 BioID2) can be probed by fluorescent streptavidin with resolutions that are undistinguishable  
573 from probing with the respective IgG antibodies (Kim et al., 2016; May et al., 2020). For the  
574 biotin ligase variant TurboID, which has a massively decreased labelling time, the biotin  
575 labelling radius was measured to be in a similar (Branon et al., 2018; Kim et al., 2016) or slightly  
576 larger range (May et al., 2020). Importantly, the addition of 50  $\mu$ M external biotin massively  
577 increased the labelling radius, while in the absence of excessive biotin, the labelling radius  
578 remained comparable to the labelling radius of BirA (May et al., 2020). In this work, we  
579 avoided the addition of additional biotin to the trypanosome medium (the medium contains  
580 0.8  $\mu$ M biotin) and serum biotin (approximately 2 nM in mammalian serum (Luong and  
581 Vashist, 2020)) was the sole source in HeLa cell medium. Our mass spectrometry data of  
582 streptavidin-affinity purified proteins with five nuclear pore localised TurboID-fusion proteins  
583 demonstrates that the labelling radius is well below the size of the nuclear pore complex  
584 under these conditions, and thus in agreement with published data. Even in expansion  
585 microscopy, with 3.6 to 4.2 -fold expansion factors, we did not notice any decrease in  
586 resolution; in fact, we could resolve NUPs that reside at different positions within the pore  
587 (e.g. inner ring vs basket) by labelling one with streptavidin and the other with an antibody  
588 and thus obtained sub-NUP imaging resolution (our own unpublished data). Even though,  
589 theoretically, BioID *per se* causes a decrease in resolution as biotinylation extends to proteins  
590 in close proximity to the bait, this may well be compensated by the lower linkage error when  
591 imaging directly via the small, compact-shaped streptavidin-tetramer rather than by a tandem  
592 assembly of two large IgG antibodies (Figure 1B).

593

#### 594 **Streptavidin tracing of biotin proximity labels delivers high signal intensities.**

595 One major benefit of streptavidin imaging was the increase in signal compared to  
596 immunofluorescence, caused by multiple biotinylation sites of the bait and adjacent proteins

597 serving as an enhancer. An increased signal is beneficial for almost all protein-imaging  
598 applications, but in particular for low abundance targets. Most strikingly, streptavidin imaging  
599 facilitates imaging targets with low densities as a consequence of the imaging method, as in  
600 expansion microscopy and CLEM and is applicable to all target proteins that tolerate tag fusion  
601 to either terminus. Notably, to the best of our knowledge, this is the first report of the use of  
602 streptavidin imaging in expansion microscopy and CLEM and the only alternative approach to  
603 immunofluorescence, as denaturing conditions associated with these methods rule out direct  
604 imaging of fluorescent tags.

605

### 606 **A combination tag as probe for phase separated areas.**

607 A further important application of the TurboID-HA tandem tag is the *de novo* prediction of  
608 phase separated areas in cells. The importance of compartmentalization by liquid-liquid phase  
609 separation for almost all cellular functions, including DNA and mRNA metabolism (Dai and  
610 Yang, 2023), cell division (Ong and Torres, 2020) and development (So et al., 2021) becomes  
611 increasingly evident. Aberrant phase separation can cause disease, as for example  
612 neurodegenerative disorders (Chakraborty and Zweckstetter, 2023; Tsoi et al., 2023),  
613 underlining the relevance of novel tools for identification and characterization of phase  
614 separated regions. For individual proteins, phase separation can be predicted *in silico* using  
615 machine learning, with limited, but increasing accuracy (Venko and Žerovnik, 2023). For a  
616 defined mixture of molecules, phase separation can be tested *in vitro* (Alberti et al., 2018;  
617 Zhang and Shen, 2023). However, methods to test phase separation in the cellular context are  
618 scarce. The correlation between antibody-inaccessibility and phase separation, that we  
619 observed in this study, offers the opportunity to use the TurboID-HA tag to probe for phase  
620 separation *de novo*. Notably, the streptavidin stain concomitantly provides a convenient  
621 intrinsic control to confirm correct localization of the fusion protein. Moreover, proteins with  
622 complex localization patterns can be simultaneously detected in both, phase-separated and  
623 non-phase separated regions, as we demonstrated for tracing MEX67 to both, the  
624 nucleoplasm and nuclear pores (Figure 1A and G). In trypanosomes, all *bona fide* phase-  
625 separated regions were inaccessible to anti-HA, namely the nucleolus, starvation stress  
626 granules and the FG NUP environment. The data strongly suggest that the absence of an HA  
627 immunofluorescence signal correlates with phase-separation. However, we cannot rule out  
628 the possibility, that some proteins may be inaccessible to anti-HA for different reasons, as for

629 example steric hindrance. The latter scenario would equally favor streptavidin over IgG  
630 antibodies for target protein binding due to its much smaller dimensions and higher binding  
631 affinity. We observed some non-FG Nups to be anti-HA inaccessible, which were mostly NUPs  
632 of the inner ring, close to the core of FG NUPs: whether these NUPs localize to phase-  
633 separated areas is not known. Importantly, problems to detect phase-separated proteins by  
634 antibodies appear conserved across species (Bear et al., 1999; Misteli, 2008; Musinova et al.,  
635 2011; Sheval et al., 2005; Zatssepina et al., 1997). We show data for the human FG-NUP Nup54  
636 as an example of an anti-HA-inaccessible protein (Figure 2F) as proof of principle, that the *de*  
637 *nov*o identification of phase-separation is applicable to human cells.

638 Why are most antibodies and, to some extent even fluorophore conjugated nanobodies,  
639 prevented from labelling proteins in phase separated environments, while streptavidin never  
640 fails? We cannot distinguish whether the lack in labelling is caused by an access problem of  
641 the antibody penetrating the phase separated area or by a reduced binding affinity between  
642 antibody and antigen in phase-separated environments, or by a combination of both. Still, the  
643 smaller size of streptavidin in comparison to an IgG tandem-antibody pair (Figure 1b) likely  
644 favors its access into dense regions. Further, IgG antibodies as well as single chain antibodies  
645 typically have affinities in the nanomolar range, comparing to femtomolar affinity of the  
646 biotin-streptavidin interaction, which is indeed among the strongest non-covalent interactions  
647 in nature (Chivers et al., 2011). Together with the extremely high structural stability of  
648 streptavidin towards temperature, pH and denaturing conditions (Laitinen et al., 2006) this  
649 can explain the ability of this probe to potently outperform antibodies in phase separated  
650 environments.

651

### 652 **Proximity-labelling reports a history of dynamic protein interactions**

653 Lastly, we propose streptavidin imaging as a novel tool to monitor dynamic interactions  
654 between proteins. Since BioID proximity labeling is not restricted to the bait protein, but  
655 extends to all interacting partners, the history of interactions is preserved. Hence, changes in  
656 protein sub-complexes can be imaged over time. We provide three examples, covering protein  
657 complex dynamics in cell cycle regulation and mRNA metabolism as well as nuclear transport.  
658 There are many other potential applications. While we relied on an endogenous, constitutive  
659 expression of TurboID fusion proteins, a tightly controlled, inducible system, as for example  
660 Split-TurboID (Cho et al., 2020) in combination with light activation (Chen et al., 2022; Shafraz

661 et al., 2023) would allow pulse chase experiment, delivering quantitative data on the kinetics  
662 of processes.

663

664 Altogether, streptavidin imaging is a highly versatile tool with multiple applications, ranging  
665 from a simple boost in signal that can be leveraged to increase imaging sensitivity in expansion  
666 microscopy and CLEM, to the ability to probe for phase-separated areas and to monitor  
667 dynamic protein interactions. It is thus an important addition to the available imaging toolbox.

668

669

#### 670 **ACKNOWLEDGEMENT**

671 The work was financed by a bilateral GACR/DFG grant (project IDs.: 21-19503J and KR4017/9-  
672 1; to M. Z. and S. K., respectively). We are grateful to the OMICS Proteomics BIOCEV core  
673 facility for excellent technical service. We thank Mark Carrington (University of Cambridge,  
674 UK) for providing anti-TbMEX67. Manfred Alsheimer is acknowledged for providing advice and  
675 plasmids on HeLa cell transfections, Christian Janzen for the BB2 antibody and Elisabeth  
676 Meyer-Natus and Tim Krüger for help with microscopy and image analysis (all University of  
677 Würzburg, Germany).

678

679



680 **FIGURE LEGENDS**

681

682 **Figure 1: The TurboID biotinylation labelling radius is sufficiently small to allow streptavidin-**  
683 **based imaging of target proteins by light microscopy**

684 **A)** Schematic representation of the trypanosome NPC (Obado et al., 2016) including selected  
685 transport factors and their enrichment observed in TurboID experiments followed by  
686 streptavidin affinity capture and LC MS/MS analysis. Proteins quantified are filled in shades of  
687 green representative of the corresponding *t*-test difference increments. The respective bait  
688 protein is drawn in pink and undetected proteins are in gray. NUP96, NUP76 and NUP110  
689 experiments were analysed with TurboID-HA fusions at both respective termini (as indicated).  
690 The nuclear envelope is drawn in sand and nucleoporins and transport factors are numbered  
691 in the legend (right) according to (Obado et al., 2016) (NMD3, Tb927.7.970; RanBP1,  
692 Tb927.11.3380; RanBPL, Tb927.10.8650; exportin 1, Tb927.11.14340; GAP, Tb927.10.7680),  
693 **B)** Schematics illustrating the imaging concept for a protein of interest (POI) by either Cy3-  
694 streptavidin or anti-HA coupled with secondary Alexa488-labelled antibodies.

695 **(C-D)** Nuclear pore proteins of *Trypanosoma brucei* (C) and HeLa cells (D) were expressed  
696 fused to the streptavidin-HA tandem tag and detected with streptavidin-cy3 (pink) and anti-  
697 HA (green). A representative single plane image of a Z-stack is shown, as raw data (C) or  
698 processed by computational clearing (D).

699

700 **Figure 2: Streptavidin can detect targets within phase-separated regions, while most**  
701 **antibodies fail**

702 **(A-B)** *T. brucei* MEX67 (A) and *T. brucei* nucleolar protein NOG1 (B) were expressed fused to a  
703 C-terminal TurboID-HA tandem tag and cells probed with streptavidin-cy3 (pink) and by anti-  
704 HA immunofluorescence (green). Representative single plane images of an unprocessed Z-  
705 stack series are shown.

706 **(C-E)** Cells expressing the stress granule marker protein PABP2 fused to TurboID-HA were  
707 starved (2 hours PBS) and starvation stress granules detected by streptavidin (pink, Cy3) and  
708 anti-HA (green, Alexa488). The starvation experiment was performed in biological triplicates.  
709 One representative image of starved cells is shown as Z-stack projection (72 slices a 140 nm,  
710 sum slices) in C. For each replicate, intensity profiles across one of the larger granules of the  
711 cell were measured for 25 cells in both fluorescence channels. The profiles for replicate 1 are

712 shown in D. For each granule, the granule diameter was calculated from the profiles at 50%  
713 fluorescence and the difference in diameter between the HA- and streptavidin stain is  
714 presented in E for each replicate, as quotient of granule diameters. Note that despite  
715 differences between the three replicates, likely arisen from starvation conditions being not  
716 100% reproducible, the HA stain consistently delivered a larger granule diameter than the  
717 streptavidin stain, consistent with preferentially peripheral staining of the granule by anti-HA.  
718 For replicate 2, the fluorophores were switched, with essentially the same result (Figure S2 in  
719 Supplementary Materials).

720 **(F)** Human NUP54 fused to TurboID-HA was expressed in HeLa cells and cells were probed  
721 with both anti-HA (green, Alexa488) and streptavidin (Cy3, shown in pink). Streptavidin, but  
722 not anti-HA detects NUP54 at the nuclear pores. A single plane image of a Z-stack, processed  
723 by computational clearing, is shown.

724 **(G and H)** *T. brucei* MEX67 (G) and NOG1 (H) were expressed as TurboID-Ty1 fusion proteins  
725 and detected with streptavidin (Cy3, shown in pink) and anti-Ty1 (BB2, green). Representative  
726 single plane images of unprocessed Z-stack images are shown.

727 **(I)** Trypanosome wild type (WT) cells were probed for MEX67 with polyclonal antiserum (kind  
728 gift of Mark Carrington, University of Cambridge; secondary antibody Alexa 488, shown in  
729 pink). One representative single plane image of an unprocessed Z-stack image is shown.

730 **(J)** *T. brucei* MEX67 (left) and NOG1 (right) were expressed as eGFP fusion proteins and  
731 detected with Cy5 labelled eGFP nanobodies. Representative single plane images of  
732 unprocessed Z-stack images are shown.

733 **(K)** *T. brucei* NOG1 was expressed fused to mNeogreen flanked by three Ty1 epitope tags on  
734 either site and detected with anti-Ty1 (secondary antibody Alexa 488; shown in pink).

735

### 736 **Figure 3: Streptavidin imaging yields higher signal intensities than immunofluorescence**

#### 737 **(A-C) Enhanced signal in standard light microscopy**

738 Trypanosome cells expressing NUP158-TurboID-HA were labelled with combinations of either  
739 streptavidin-Cy3 and anti-HA/Alexa488 secondary (A) or with streptavidin-Alexa488 and anti-  
740 HA//Alexa 594 secondary (B). Z-stack images were recorded (48 slices a 140 nm).  
741 Representative, unprocessed single plane images are shown (A and B). The maximum  
742 Alexa488 fluorescence was quantified from Z-stack projections (sum slices) from 60 cells

743 probed with anti-HA or streptavidin; the data are presented as a dot blot (waist is median; box  
744 is IQR; whiskers are  $\pm 1.5$  IQR) (C)

745 **(D) Improved signal in expansion microscopy**

746 Trypanosome cells expressing NUP76-TurboID-HA or MEX67-TurboID-HA were imaged using  
747 Pro-expansion or Ultra-expansion microscopy. Single plane and Z-stack projections (sum  
748 slices) of the streptavidin and anti-HA signal are shown for one representative nucleus. All  
749 images were deconvolved in proExM, except for NUP76<sub>anti-HA</sub>.

750 **(E-F) Improved signal in CLEM**

751 Trypanosome cells expressing NUP158-TurboID-HA were embedded in LR-White resin. Slices  
752 were probed with streptavidin and anti-HA and imaged by light microscopy (E) followed by  
753 electron microscopy (CLEM) (F).

754

755 **Figure 4: Visualisation of protein interactions with TurboID**

756 **(A)** Trypanosome cells expressing PABP2-TurboID-HA were probed with streptavidin and anti-  
757 HA. A representative image of the posterior part of a cell is shown (single plane of a Z-stack  
758 processed by computational clearing). The position of posterior pole granule is indicated by  
759 arrows.

760 **(B)** Trypanosome cells were transformed to co-express PABP2-mChFP and ALPH1-eYFP. A  
761 representative image of the posterior part of a cell is shown (single plane of a Z-stack  
762 processed by deconvolution). The position of posterior pole granule is indicated by arrows.

763 **(C)** Trypanosome cells expressing TurboID-HA-MLP2 were probed with streptavidin and anti-  
764 HA. One representative image of an interphase, prophase, metaphase and an anaphase cell  
765 are shown. All images are unprocessed single plane images, with the exception of the DAPI  
766 image that is a Z-stack projection (max intensity of 48 slices a 140 nm).

767 **(D and E)** Trypanosome cells expressing NUP65 (D) or NUP75 (E) fused to a C-terminal TurboID-  
768 HA tag were probed with streptavidin. Single plane and Z-stack projection (sum slices of 48  
769 slices a 140 m) of unprocessed images are shown.

770

771 **Figure 5: A refined map of the *T. brucei* nuclear pore complex**

772 Each known *T. brucei* nuclear pore protein was expressed fused to TurboID-HA, each both at  
773 the N- and C-terminus. Cells were labelled with anti-HA and with streptavidin.

774 **(A)** For each NUP, a representative image of the nucleus is shown as unprocessed, single plane  
775 of a Z-stack. We evaluated the extent of anti-HA stain in colour increments (shown as a bar  
776 above images).

777 **(B)** The HA-signal at the nuclear pores was mapped onto a schematic representation of the  
778 trypanosome NPC (modified from (Obado et al., 2016)) using the same colour increments.

779 **(C)** Scheme of the *T. brucei* nuclear pore, with known FG NUPs (Obado et al., 2016) shown in  
780 black on the left side and prediction of phase separation (Chu et al., 2022) mapped on the  
781 right.

782

783 Figure S1: Statistical analysis of NUP TurboID experiments

784 Figure S2: colour Swap PABP2-TurboID-HA

785 Figure S3: PABP2-eYFP starved and profile

786 Figure S4: LR White probing NUP158, NUP96

787 Figure S5: Mlp2/Nup92, image with many cells, both C and N terminal

788 Figure S6: Western blots Phase ID

789 Figure S7: no correlation between antigen abundance and absence of HA signal

790 Table S1: List of all plasmids used in this work.

791 Table S2: NUP TurboID proteomics data and statistical analysis.

792

793

794 **LITERATURE**

795

796

797 **Alberti, S., Saha, S., Woodruff, J. B., Franzmann, T. M., Wang, J. and Hyman, A. A.** (2018). A  
798 User's Guide for Phase Separation Assays with Purified Proteins. *Journal of Molecular*  
799 *Biology* 1–15.

800 **Aslett, M., Aurrecochea, C., Berriman, M., Brestelli, J., Brunk, B. P., Carrington, M.,**  
801 **Depledge, D. P., Fischer, S., Gajria, B., Gao, X., et al.** (2010). TriTrypDB: a functional  
802 genomic resource for the Trypanosomatidae. *Nucleic Acids Research* **38**, D457-62.

803 **Bear, J., Tan, W., Zolotukhin, A. S., Taberner, C., Hudson, E. A. and Felber, B. K.** (1999).  
804 Identification of Novel Import and Export Signals of Human TAP, the Protein That Binds  
805 to the Constitutive Transport Element of the Type D Retrovirus mRNAs. *Mol. Cell. Biol.*  
806 **19**, 6306–6317.

807 **Ben-Yishay, R., Mor, A., Shraga, A., Ashkenazy-Titelman, A., Kinor, N., Schwed-Gross, A.,**  
808 **Jacob, A., Kozler, N., Kumar, P., Garini, Y., et al.** (2019). Imaging within single NPCs  
809 reveals NXF1's role in mRNA export on the cytoplasmic side of the pore. *J. Cell Biol.* **218**,  
810 2962–2981.

811 **Billington, K., Halliday, C., Madden, R., Dyer, P., Barker, A. R., Moreira-Leite, F. F.,**  
812 **Carrington, M., Vaughan, S., Hertz-Fowler, C., Dean, S., et al.** (2023). Genome-wide  
813 subcellular protein map for the flagellate parasite *Trypanosoma brucei*. *Nat. Microbiol.* **8**,  
814 533–547.

815 **Branon, T. C., Bosch, J. A., Sanchez, A. D., Udeshi, N. D., Svinkina, T., Carr, S. A., Feldman, J.**  
816 **L., Perrimon, N. and Ting, A. Y.** (2018). Efficient proximity labeling in living cells and  
817 organisms with TurboID. *Nature biotechnology* **36**, 880–887.

818 **Brun, R. and Schönenberger** (1979). Cultivation and in vitro cloning or procyclic culture  
819 forms of *Trypanosoma brucei* in a semi-defined medium. Short communication. *Acta*  
820 *tropica* **36**, 289–292.

821 **Chakraborty, P. and Zweckstetter, M.** (2023). Role of aberrant phase separation in  
822 pathological protein aggregation. *Curr. Opin. Struct. Biol.* **82**, 102678.

823 **Chen, F., Tillberg, P. W. and Boyden, E. S.** (2015). Expansion microscopy. *Science* **347**, 543–  
824 548.

825 **Chen, R., Zhang, N., Zhou, Y. and Jing, J.** (2022). Optical Sensors and Actuators for Probing  
826 Proximity-Dependent Biotinylation in Living Cells. *Front Cell Neurosci* **16**, 801644.

827 **Chivers, C. E., Koner, A. L., Lowe, E. D. and Howarth, M.** (2011). How the biotin–  
828 streptavidin interaction was made even stronger: investigation via crystallography and a  
829 chimaeric tetramer. *Biochem. J.* **435**, 55–63.

- 830 **Cho, K. F., Branon, T. C., Rajeev, S., Svinkina, T., Udeshi, N. D., Thoudam, T., Kwak, C.,**  
831 **Rhee, H.-W., Lee, I.-K., Carr, S. A., et al. (2020).** Split-TurboID enables contact-dependent  
832 proximity labeling in cells. *Proc National Acad Sci* **117**, 12143–12154.
- 833 **Chu, X., Sun, T., Li, Q., Xu, Y., Zhang, Z., Lai, L. and Pei, J. (2022).** Prediction of liquid–liquid  
834 phase separating proteins using machine learning. *BMC Bioinform.* **23**, 72.
- 835 **Cox, J. and Mann, M. (2008).** MaxQuant enables high peptide identification rates,  
836 individualized p.p.b.-range mass accuracies and proteome-wide protein quantification.  
837 *Nature biotechnology* **26**, 1367–1372.
- 838 **Cox, J., Hein, M. Y., Lubner, C. A., Paron, I., Nagaraj, N. and Mann, M. (2014).** Accurate  
839 Proteome-wide Label-free Quantification by Delayed Normalization and Maximal Peptide  
840 Ratio Extraction, Termed MaxLFQ\*. *Mol Cell Proteomics* **13**, 2513–2526.
- 841 **Dai, Z. and Yang, X. (2023).** The regulation of liquid-liquid phase separated condensates  
842 containing nucleic acids. *FEBS J.*
- 843 **Davis, L. K., Ford, I. J. and Hoogenboom, B. W. (2022).** Crowding-induced phase separation  
844 of nuclear transport receptors in FG nucleoporin assemblies. *eLife* **11**, e72627.
- 845 **Dean, S., Sunter, J., Wheeler, R. J., Hodgkinson, I., Gluenz, E. and Gull, K. (2015).** A toolkit  
846 enabling efficient, scalable and reproducible gene tagging in trypanosomatids. *Open*  
847 *biology* **5**, 140197.
- 848 **Derrer, C. P., Mancini, R., Vallotton, P., Huet, S., Weis, K. and Dultz, E. (2019).** The RNA  
849 export factor Mex67 functions as a mobile nucleoporin. *The Journal of Cell Biology* **218**,  
850 3967–3976.
- 851 **Dostalova, A., Käser, S., Cristodero, M. and Schimanski, B. (2013).** The nuclear mRNA  
852 export receptor Mex67-Mtr2 of *Trypanosoma brucei* contains a unique and essential zinc  
853 finger motif. *Molecular Microbiology* **88**, 728–739.
- 854 **Fritz, M., Vanselow, J., Sauer, N., Lamer, S., Goos, C., Siegel, T. N., Subota, I., Schlosser, A.,**  
855 **Carrington, M. and Kramer, S. (2015).** Novel insights into RNP granules by employing the  
856 trypanosome’s microtubule skeleton as a molecular sieve. *Nucleic Acids Research* **43**,  
857 8013–8032.
- 858 **Gambarotto, D., Zwettler, F. U., Guennec, M. L., Schmidt-Cernohorska, M., Fortun, D.,**  
859 **Borgers, S., Heine, J., Schloetel, J. G., Reuss, M., Unser, M., et al. (2019).** Imaging cellular  
860 ultrastructures using expansion microscopy (U-ExM). *Nat Methods* **16**, 71–74.
- 861 **Gambarotto, D., Hamel, V. and Guichard, P. (2020).** Ultrastructure expansion microscopy  
862 (U-ExM). *Methods Cell Biol* **161**, 57–81.
- 863 **Holden, J. M., Koreny, L., Obado, S., Ratushny, A. V., Chen, W. M., Chiang, J. H., Kelly, S.,**  
864 **Chait, B. T., Aitchison, J. D., Rout, M. P., et al. (2014).** Nuclear pore complex evolution: a

- 865 trypanosome Mlp analogue functions in chromosomal segregation but lacks  
866 transcriptional barrier activity. *Molecular biology of the cell* **25**, 1421–1436.
- 867 **Katahira, J., Strässer, K., Podtelejnikov, A., Mann, M., Jung, J. U. and Hurt, E.** (1999). The  
868 Mex67p-mediated nuclear mRNA export pathway is conserved from yeast to human. *The*  
869 *EMBO journal* **18**, 2593–2609.
- 870 **Kelly, S., Reed, J., Kramer, S., Ellis, L., Webb, H., Sunter, J., Salje, J., Marinsek, N., Gull, K.,**  
871 **Wickstead, B., et al.** (2007). Functional genomics in *Trypanosoma brucei*: a collection of  
872 vectors for the expression of tagged proteins from endogenous and ectopic gene loci.  
873 *Molecular & Biochemical Parasitology* **154**, 103–109.
- 874 **Kim, D. I., Birendra, K. C., Zhu, W., Motamedchaboki, K., Doye, V. and Roux, K. J.** (2014).  
875 Probing nuclear pore complex architecture with proximity-dependent biotinylation.  
876 *Proceedings of the National Academy of Sciences of the United States of America* **111**,  
877 E2453–61.
- 878 **Kim, D. I., Jensen, S. C., Noble, K. A., KC, B., Roux, K. H., Motamedchaboki, K. and Roux, K.**  
879 **J.** (2016). An improved smaller biotin ligase for BioID proximity labeling. *Mol. Biology Cell*  
880 **27**, 1188–1196.
- 881 **Köhler, A. and Hurt, E.** (2007). Exporting RNA from the nucleus to the cytoplasm. *Nature*  
882 *Reviews Molecular Cell Biology* **8**, 761–773.
- 883 **Kramer, S.** (2017). The ApaH-like phosphatase TbALPH1 is the major mRNA decapping  
884 enzyme of trypanosomes. *PLoS Pathogens* **13**, e1006456.
- 885 **Kramer, S., Queiroz, R., Ellis, L., Webb, H., Hoheisel, J. D., Clayton, C. E. and Carrington, M.**  
886 (2008). Heat shock causes a decrease in polysomes and the appearance of stress granules  
887 in trypanosomes independently of eIF2(alpha) phosphorylation at Thr169. *Journal of Cell*  
888 *Science* **121**, 3002–3014.
- 889 **Kramer, S., Kimblin, N. C. and Carrington, M.** (2010). Genome-wide in silico screen for  
890 CCCH-type zinc finger proteins of *Trypanosoma brucei*, *Trypanosoma cruzi* and  
891 *Leishmania major*. *BMC genomics* **11**, 283.
- 892 **Kramer, S., Bannerman-Chukualim, B., Ellis, L., Boulden, E. A., Kelly, S., Field, M. C. and**  
893 **Carrington, M.** (2013). Differential Localization of the Two *T. brucei* Poly(A) Binding  
894 Proteins to the Nucleus and RNP Granules Suggests Binding to Distinct mRNA Pools. *PLoS*  
895 *ONE* **8**, e54004.
- 896 **Kramer, S., Meyer-Natus, E., Stigloher, C., Thoma, H., Schnauffer, A. and Engstler, M.**  
897 (2020). Parallel monitoring of RNA abundance, localization and compactness with  
898 correlative single molecule FISH on LR White embedded samples. *Nucleic Acids Res* **49**,  
899 gkaa1142-.

- 900 **Kramer, S., Karolak, N. K., Odenwald, J., Gabiatti, B., Londoño, P. A. C., Zavřelová, A.,**  
901 **Freire, E. R., Almeida, K. S., Braune, S., Moreira, C., et al. (2023).** A unique mRNA  
902 decapping complex in trypanosomes. *Nucleic Acids Res.* **51**, 7520–7540.
- 903 **Laitinen, O. H., Hytönen, V. P., Nordlund, H. R. and Kulomaa, M. S. (2006).** Genetically  
904 engineered avidins and streptavidins. *Cell. Mol. Life Sci. CMLS* **63**, 2992–3017.
- 905 **Luong, J. H. T. and Vashist, S. K. (2020).** Chemistry of Biotin–Streptavidin and the Growing  
906 Concern of an Emerging Biotin Interference in Clinical Immunoassays. *ACS Omega* **5**, 10–  
907 18.
- 908 **Mangus, D. A., Evans, M. C. and Jacobson, A. (2003).** Poly(A)-binding proteins:  
909 multifunctional scaffolds for the post-transcriptional control of gene expression. *Genome*  
910 *biology* **4**, 223.
- 911 **May, D. G., Scott, K. L., Campos, A. R. and Roux, K. J. (2020).** Comparative Application of  
912 BioID and TurboID for Protein-Proximity Biotinylation. *Cells* **9**, 1070.
- 913 **McCulloch, R., Vassella, E., Burton, P., Boshart, M. and Barry, J. D. (2004).** Transformation  
914 of monomorphic and pleomorphic *Trypanosoma brucei*. *Methods in molecular biology*  
915 *(Clifton, NJ)* **262**, 53–86.
- 916 **Misteli, T. (2008).** Physiological importance of RNA and protein mobility in the cell nucleus.  
917 *Histochem. Cell Biol.* **129**, 5–11.
- 918 **Moreira, C. M. do N., Kelemen, C. D., Obado, S. O., Zahedifard, F., Zhang, N., Holetz, F. B.,**  
919 **Gauglitz, L., Dallagiovanna, B., Field, M. C., Kramer, S., et al. (2023).** Impact of inherent  
920 biases built into proteomic techniques: Proximity labeling and affinity capture compared.  
921 *J Biol Chem* **299**, 102726.
- 922 **Morelle, C., Sterkers, Y., Crobu, L., MBang-Benet, D. E., Kuk, N., Portalès, P., Bastien, P.,**  
923 **Pagès, M. and Lachaud, L. (2015).** The nucleoporin Mlp2 is involved in chromosomal  
924 distribution during mitosis in trypanosomatids. *Nucleic Acids Research* **43**, 4013–4027.
- 925 **Musinova, Y. R., Lisitsyna, O. M., Golyshv, S. A., Tuzhikov, A. I., Polyakov, V. Y. and**  
926 **Sheval, E. V. (2011).** Nucleolar localization/retention signal is responsible for transient  
927 accumulation of histone H2B in the nucleolus through electrostatic interactions. *Biochim.*  
928 *Biophys. Acta (BBA) - Mol. Cell Res.* **1813**, 27–38.
- 929 **Nag, N., Sasidharan, S., Uversky, V. N., Saudagar, P. and Tripathi, T. (2022).** Phase  
930 separation of FG-nucleoporins in nuclear pore complexes. *Biochimica Et Biophysica Acta*  
931 *Bba - Mol Cell Res* **1869**, 119205.
- 932 **Neuhaus, E. M., Horstmann, H., Almers, W., Maniak, M. and Soldati, T. (1998).** Ethane-  
933 Freezing/Methanol-Fixation of Cell Monolayers: A Procedure for Improved Preservation  
934 of Structure and Antigenicity for Light and Electron Microscopies. *J. Struct. Biol.* **121**,  
935 326–342.



- 936 **Obado, S. O., Brillantes, M., Uryu, K., Zhang, W., Ketaren, N. E., Chait, B. T., Field, M. C.**  
937 **and Rout, M. P.** (2016). Interactome Mapping Reveals the Evolutionary History of the  
938 Nuclear Pore Complex. *PLoS biology* **14**, e1002365.
- 939 **Ong, J. Y. and Torres, J. Z.** (2020). Phase Separation in Cell Division. *Mol Cell* **80**, 9–20.
- 940 **Perez-Riverol, Y., Csordas, A., Bai, J., Bernal-Llinares, M., Hewapathirana, S., Kundu, D. J.,**  
941 **Inuganti, A., Griss, J., Mayer, G., Eisenacher, M., et al.** (2019). The PRIDE database and  
942 related tools and resources in 2019: improving support for quantification data. *Nucleic*  
943 *Acids Research* **47**, D442–D450.
- 944 **Piña, R., Santos-Díaz, A. I., Orta-Salazar, E., Aguilar-Vazquez, A. R., Mantellero, C. A.,**  
945 **Acosta-Galeana, I., Estrada-Mondragon, A., Prior-Gonzalez, M., Martinez-Cruz, J. I. and**  
946 **Rosas-Arellano, A.** (2022). Ten Approaches That Improve Immunostaining: A Review of  
947 the Latest Advances for the Optimization of Immunofluorescence. *Int. J. Mol. Sci.* **23**,  
948 1426.
- 949 **Pozzi, B., Naguleswaran, A., Florini, F., Rezaei, Z. and Roditi, I.** (2023). The RNA export  
950 factor TbMex67 connects transcription and RNA export in *Trypanosoma brucei* and sets  
951 boundaries for RNA polymerase I. *Nucleic Acids Res.* **51**, 5177–5192.
- 952 **Rappsilber, J., Mann, M. and Ishihama, Y.** (2007). Protocol for micro-purification,  
953 enrichment, pre-fractionation and storage of peptides for proteomics using StageTips.  
954 *Nat Protoc* **2**, 1896–1906.
- 955 **Rodriguez, M. S., Dargemont, C. and Stutz, F.** (2004). Nuclear export of RNA. *Biol. Cell* **96**,  
956 639–655.
- 957 **Schwede, A., Manful, T., Jha, B. A., Helbig, C., Bercovich, N., Stewart, M. and Clayton, C. E.**  
958 (2009). The role of deadenylation in the degradation of unstable mRNAs in  
959 trypanosomes. *Nucleic Acids Research* **37**, 5511–5528.
- 960 **Shafraz, O., Davis, C. M. O. and Sivasankar, S.** (2023). Light Activated BioID (LAB): an  
961 optically activated proximity labeling system to study protein-protein interactions. *J. Cell*  
962 *Sci.* **136**, jcs261430.
- 963 **Sherwin, T. and Gull, K.** (1989). Visualization of detyrosination along single microtubules  
964 reveals novel mechanisms of assembly during cytoskeletal duplication in trypanosomes.  
965 *Cell* **57**, 211–221.
- 966 **Sheval, E. V., Polzikov, M. A., Olson, M. O. J. and Zatsepina, O. V.** (2005). A higher  
967 concentration of an antigen within the nucleolus may prevent its proper recognition by  
968 specific antibodies. *Eur. J. Histochem. : EJH* **49**, 117–23.
- 969 **So, C., Cheng, S. and Schuh, M.** (2021). Phase Separation during Germline Development.  
970 *Trends Cell Biol.* **31**, 254–268.

- 971 **Stewart, M.** (2019). Polyadenylation and nuclear export of mRNAs. *Journal of Biological*  
972 *Chemistry* **294**, 2977–2987.
- 973 **Sträßer, K., Baßler, J. and Hurt, E.** (2000). Binding of the Mex67p/Mtr2p Heterodimer to  
974 Fxfg, Gfkg, and Fg Repeat Nucleoporins Is Essential for Nuclear mRNA Export. *J. Cell Biol.*  
975 **150**, 695–706.
- 976 **Sunter, J., Wickstead, B., Gull, K. and Carrington, M.** (2012). A new generation of T7 RNA  
977 polymerase-independent inducible expression plasmids for *Trypanosoma brucei*. *PLoS*  
978 *ONE* **7**, e35167.
- 979 **Svistunova, D. M., Musinova, Y. R., Polyakov, V. Yu. and Sheval, E. V.** (2011). A Simple  
980 Method for the Immunocytochemical Detection of Proteins Inside Nuclear Structures  
981 That Are Inaccessible to Specific Antibodies. *J. Histochem. Cytochem.* **60**, 152–158.
- 982 **Terry, L. J. and Wenthe, S. R.** (2007). Nuclear mRNA export requires specific FG nucleoporins  
983 for translocation through the nuclear pore complex. *J. Cell Biol.* **178**, 1121–1132.
- 984 **Tillberg, P. W., Chen, F., Piatkevich, K. D., Zhao, Y., Yu, C.-C. (Jay), English, B. P., Gao, L.,**  
985 **Martorell, A., Suk, H.-J., Yoshida, F., et al.** (2016). Protein-retention expansion  
986 microscopy of cells and tissues labeled using standard fluorescent proteins and  
987 antibodies. *Nat. Biotechnol.* **34**, 987–992.
- 988 **Tinti, M. and Ferguson, M. A. J.** (2022). Visualisation of proteome-wide ordered protein  
989 abundances in *Trypanosoma brucei*. *Wellcome Open Res.* **7**, 34.
- 990 **Tsoi, P. S., Quan, M. D., Ferreon, J. C. and Ferreon, A. C. M.** (2023). Aggregation of  
991 Disordered Proteins Associated with Neurodegeneration. *Int. J. Mol. Sci.* **24**, 3380.
- 992 **Tyanova, S., Temu, T., Sinitcyn, P., Carlson, A., Hein, M. Y., Geiger, T., Mann, M. and Cox, J.**  
993 (2016). The Perseus computational platform for comprehensive analysis of (prote)omics  
994 data. *Nature methods* **13**, 731–740.
- 995 **Venko, K. and Žerovnik, E.** (2023). Protein Condensates and Protein Aggregates: In Vitro, in  
996 the Cell, and In Silico. *Front. Biosci.-Landmark* **28**, 183.
- 997 **Youn, J.-Y., Dunham, W. H., Hong, S. J., Knight, J. D. R., Bashkurov, M., Chen, G. I., Bagci,**  
998 **H., Rathod, B., MacLeod, G., Eng, S. W. M., et al.** (2018). High-Density Proximity  
999 Mapping Reveals the Subcellular Organization of mRNA-Associated Granules and Bodies.  
1000 *Mol. Cell* **69**, 517-532.e11.
- 1001 **Zatsepina, O. V., Todorov, I. T., Philipova, R. N., Krachmarov, C. P., Trendelenburg, M. F.**  
1002 **and Jordan, E. G.** (1997). Cell cycle-dependent translocations of a major nucleolar  
1003 phosphoprotein, B23, and some characteristics of its variants. *Eur. J. cell Biol.* **73**, 58–70.
- 1004 **Zhang, Y. and Shen, L.** (2023). An in vitro Assay to Probe the Formation of Biomolecular  
1005 Condensates. *Bio-Protoc.* **13**, e4813.

1006

Figure 1

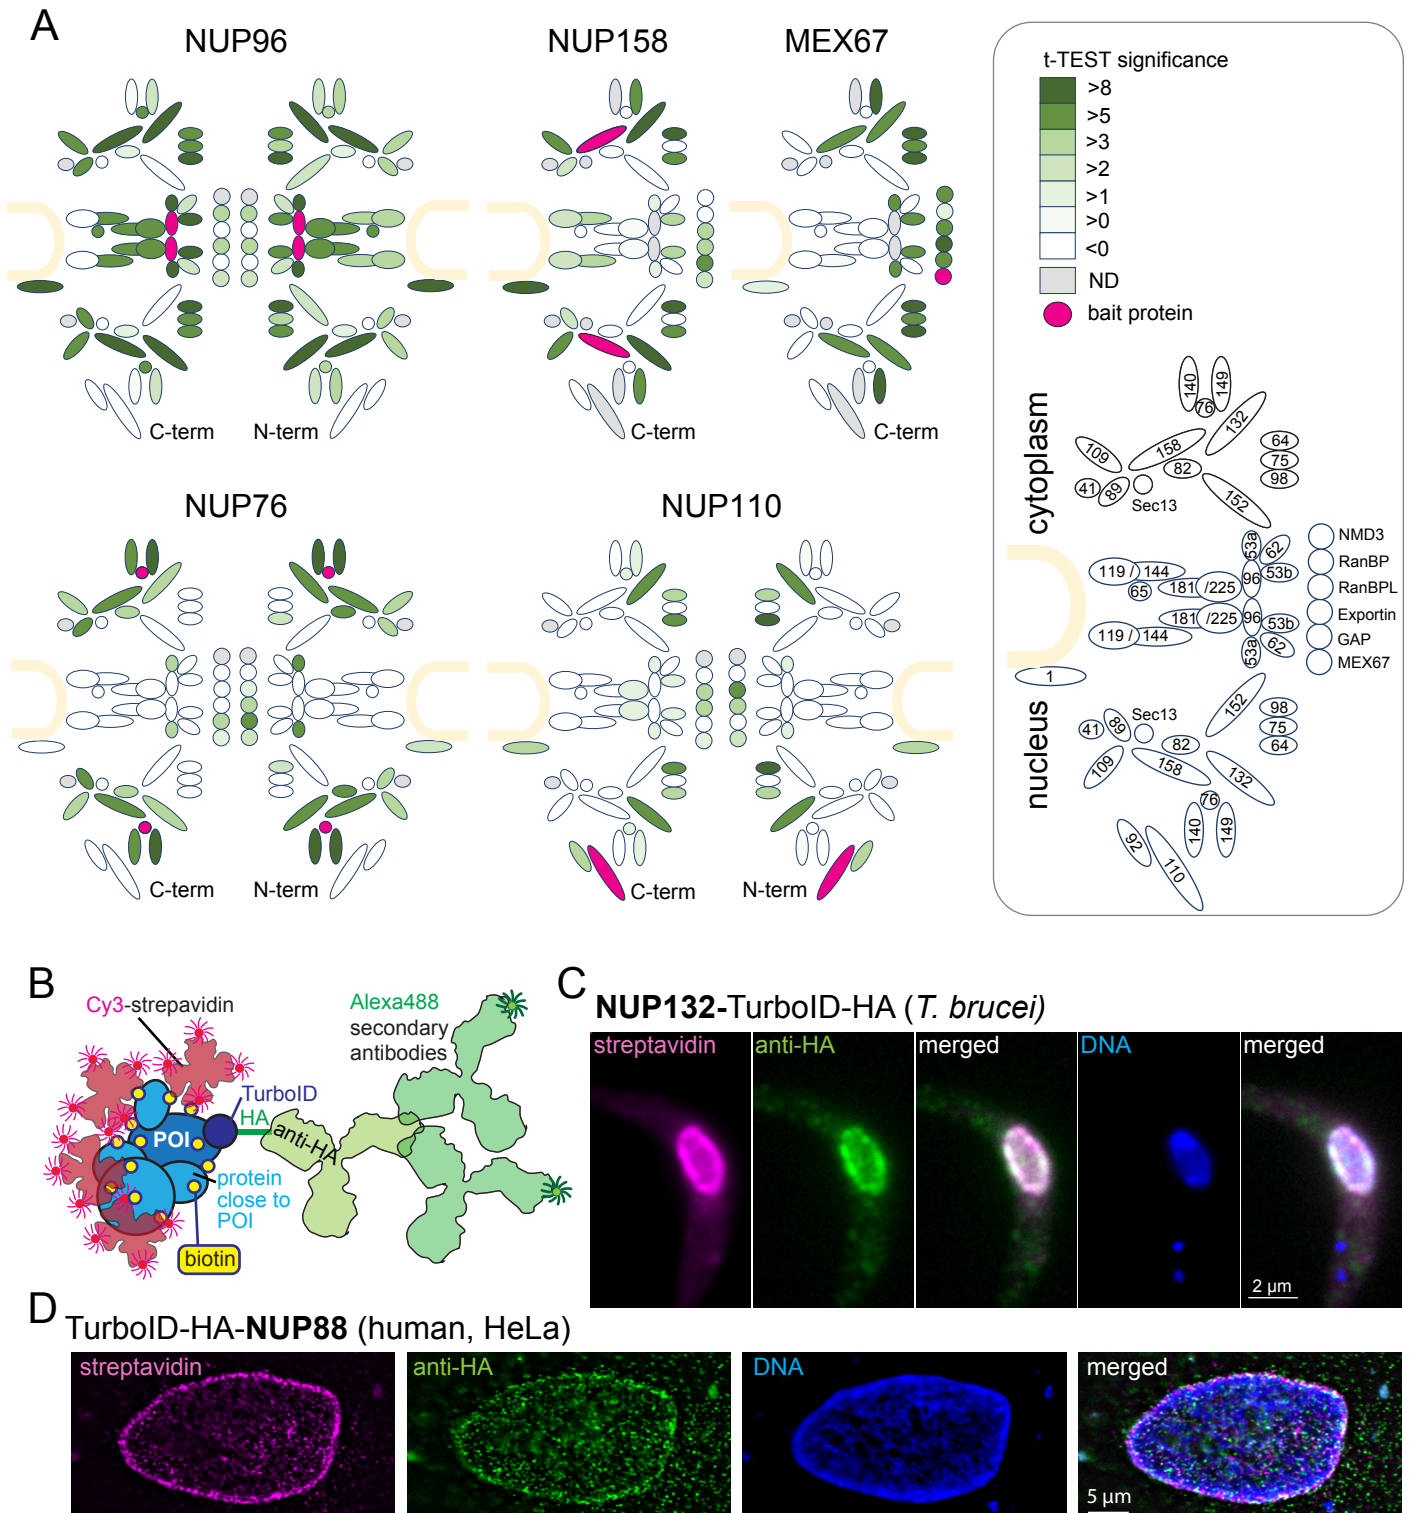

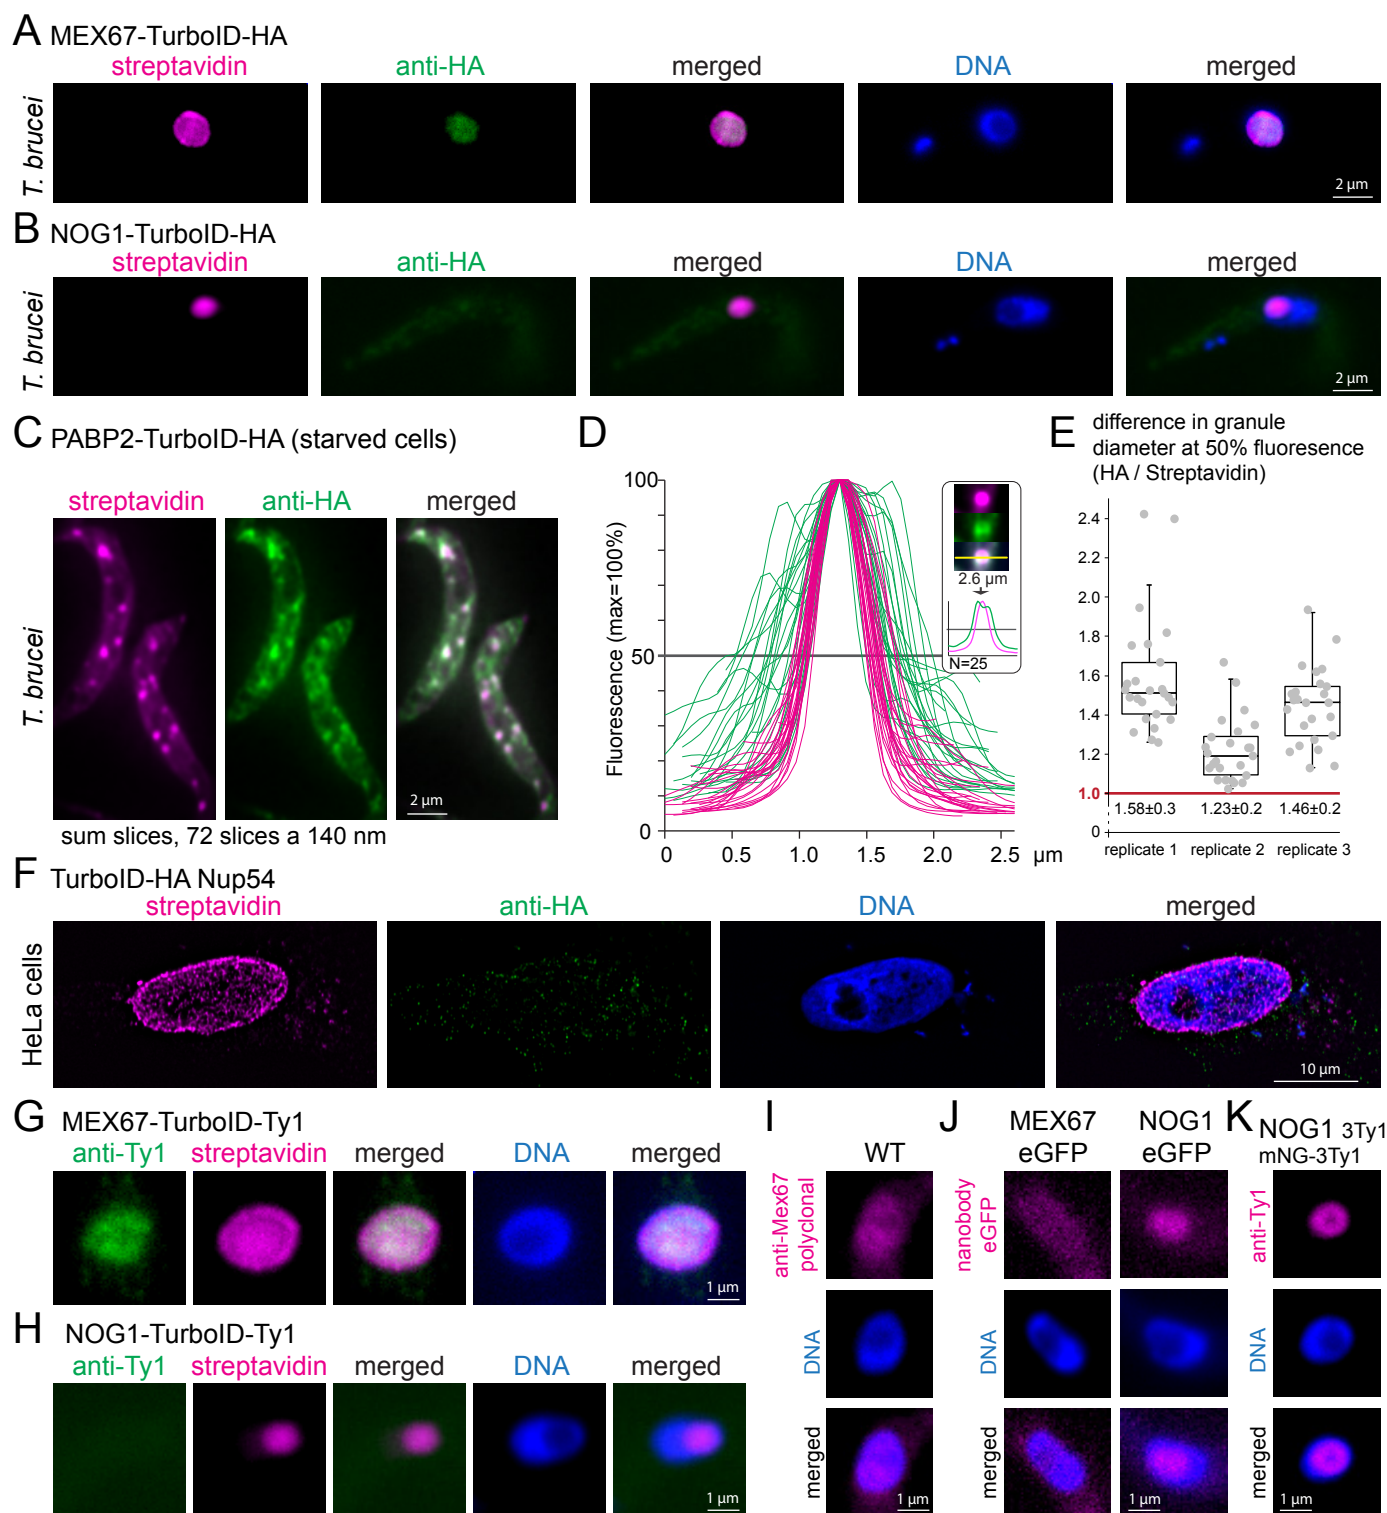

## Figure 3

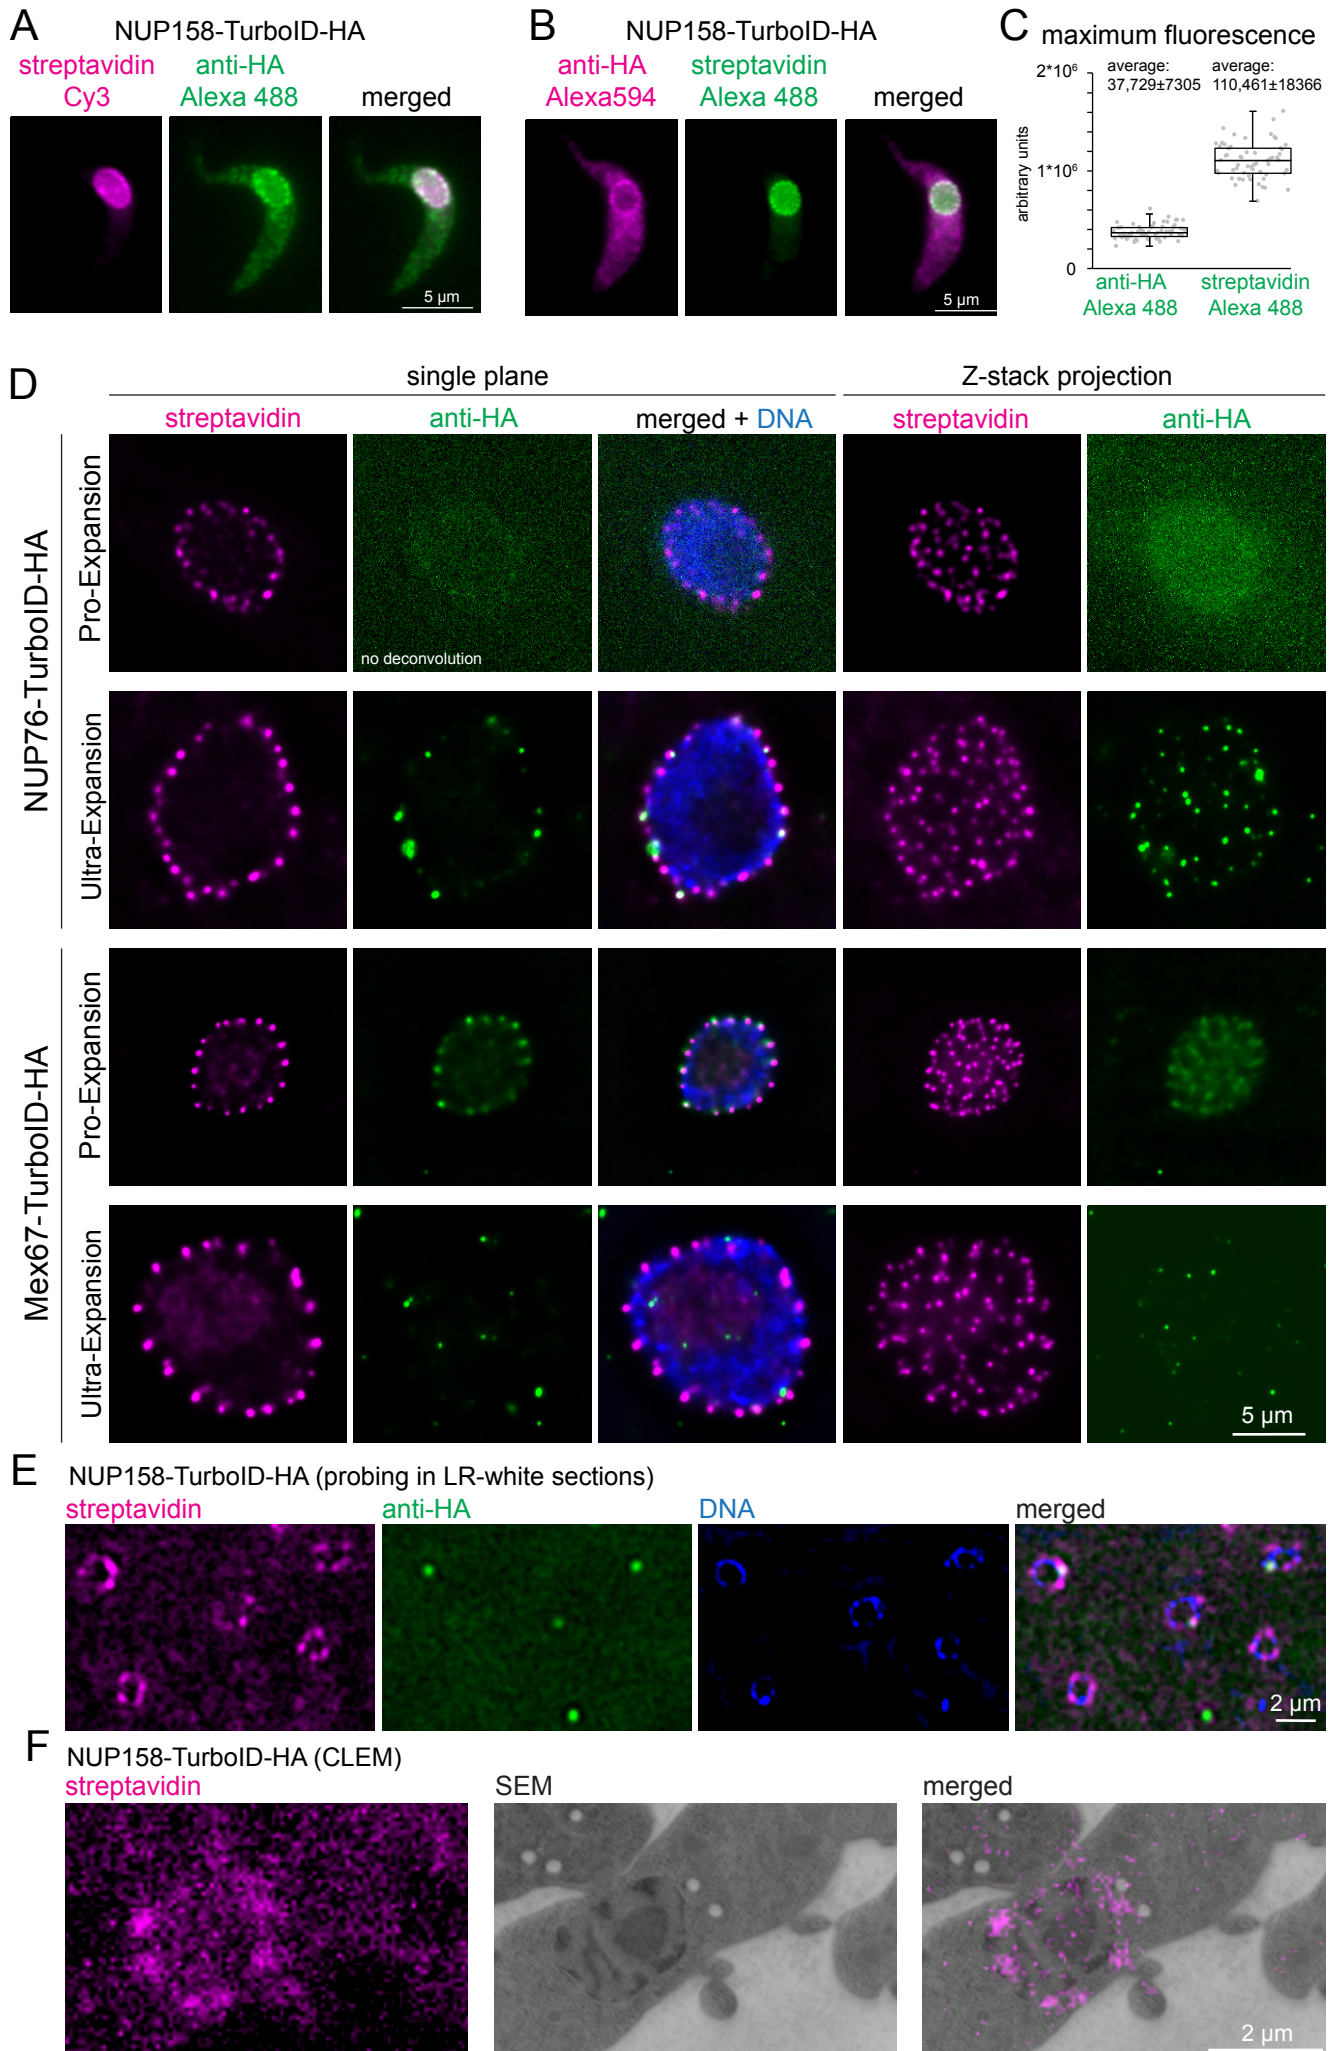

## Figure 4

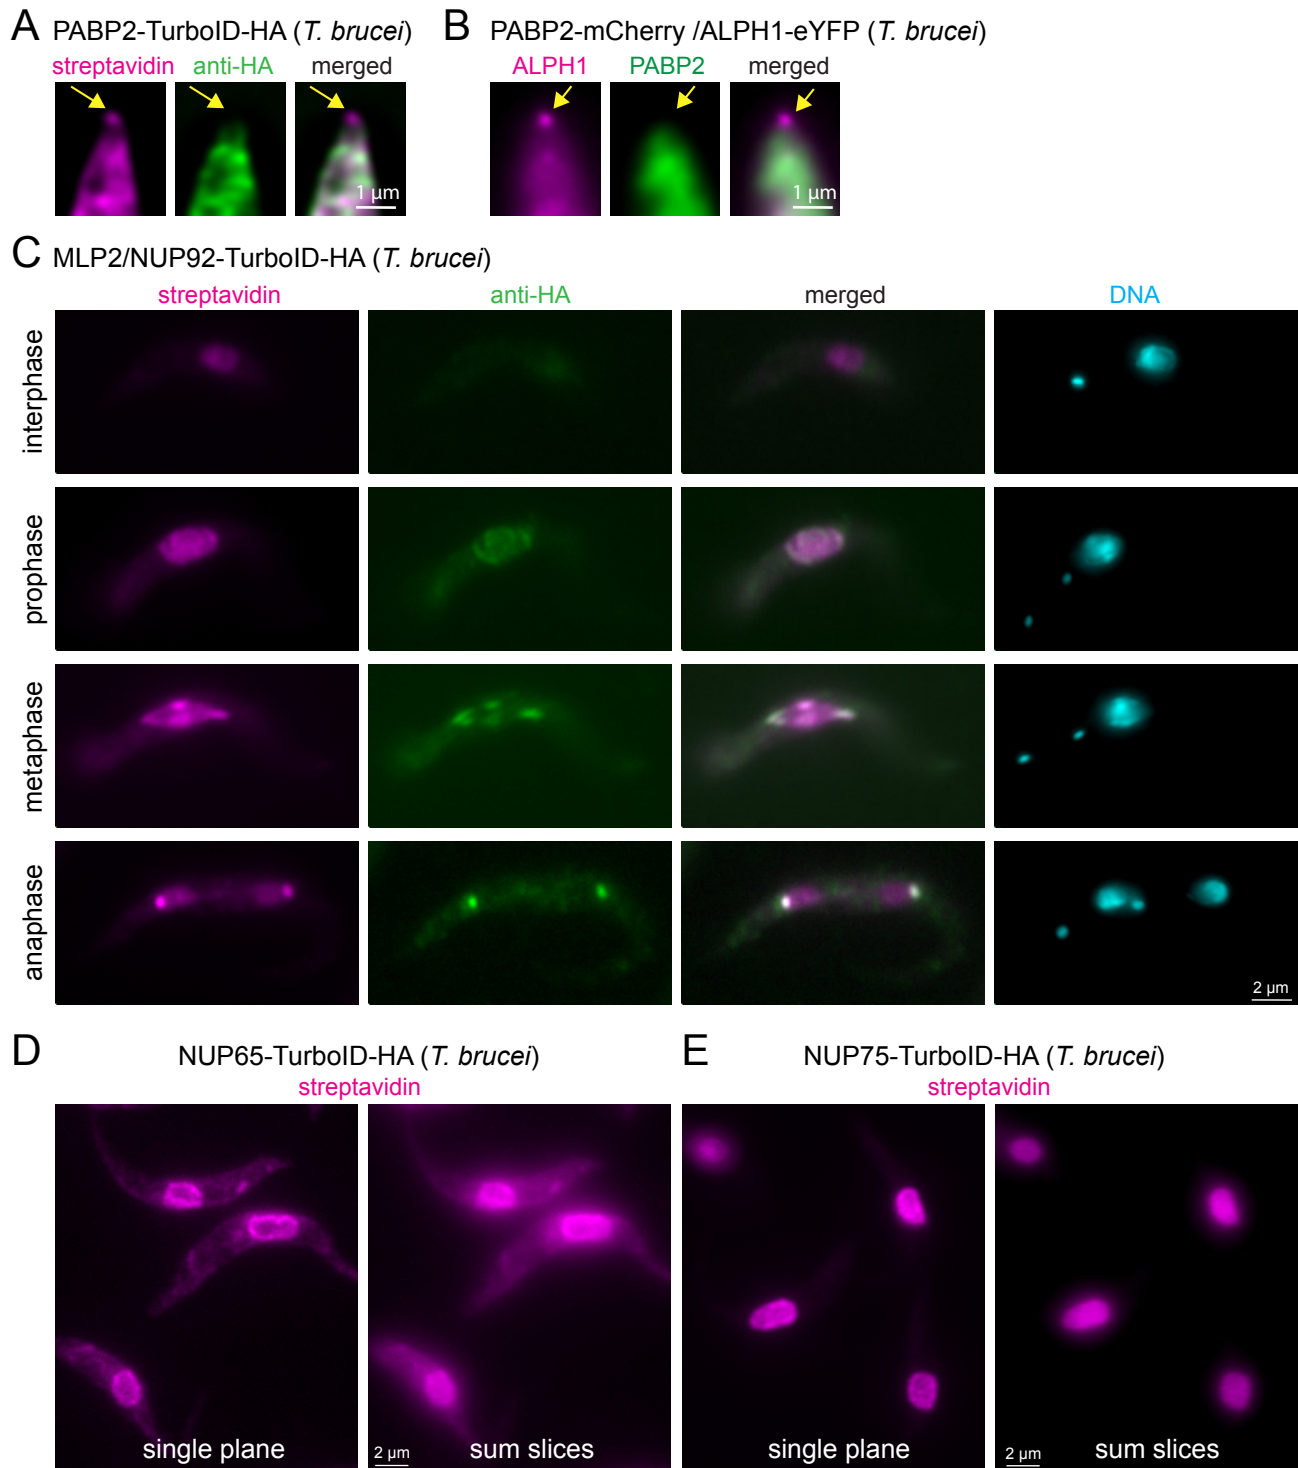

Figure 5

A

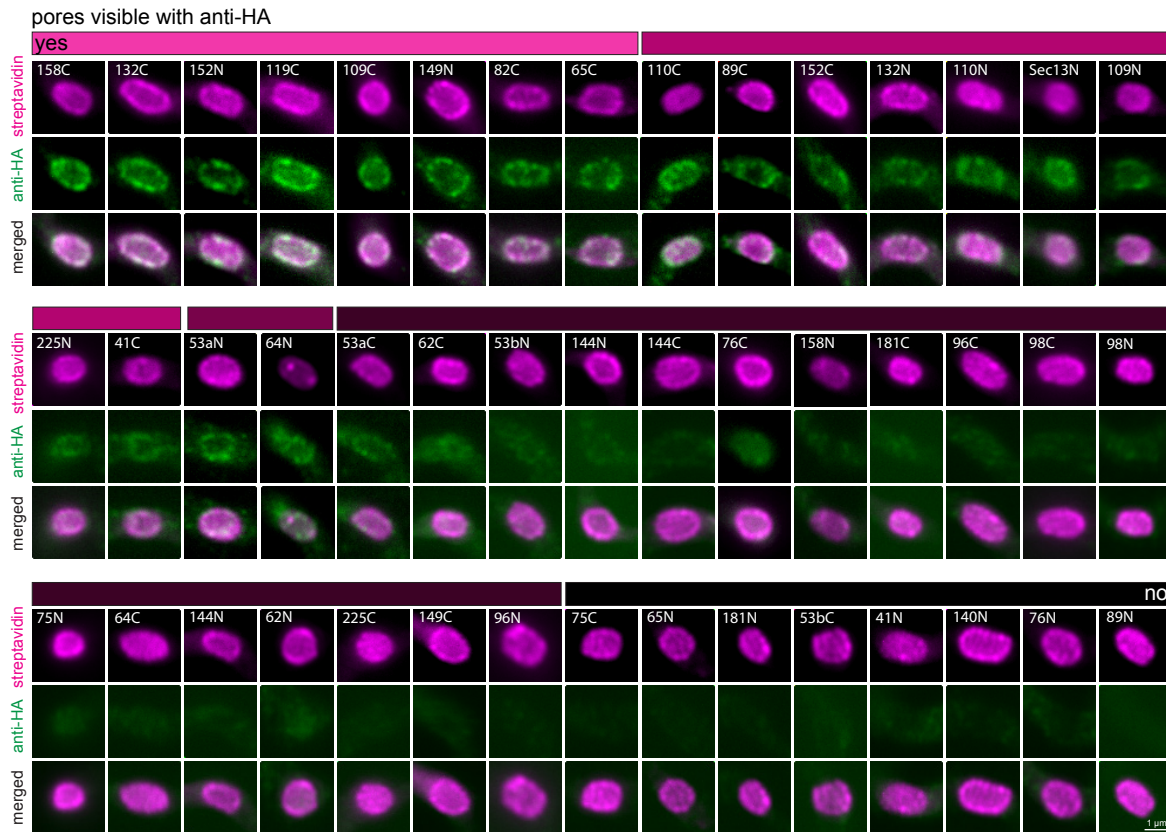

B

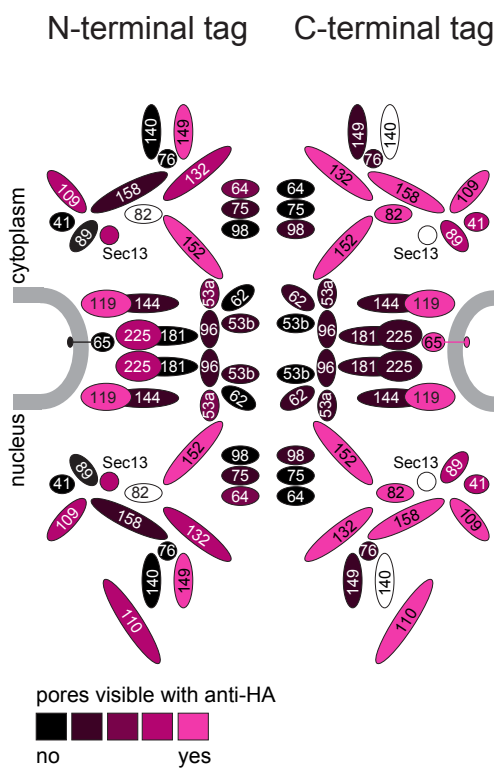

C

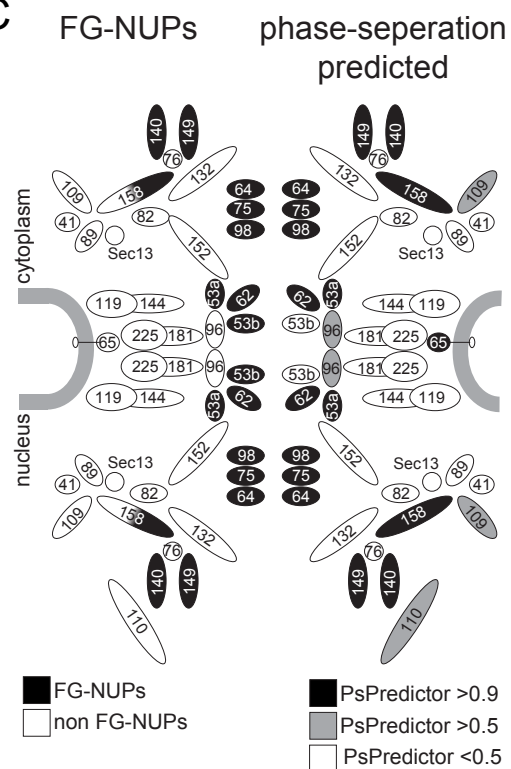

Source: https://www.biorxiv.org/content/10.1101/2023.12.01.569576.full.pdf
